# Supplementary material for: The cell type resolved mouse transcriptome in neuron-enriched brain tissues from the hippocampus and cerebellum during prion disease
Source: PubMed Central journal article supplement (PMC6355796; doi:10.1038/s41598-018-37715-z), 2019-01-31
Supplement: 41598_2018_37715_MOESM1_ESM.pdf [file 41598_2018_37715_MOESM1_ESM.pdf]

**The cell type resolved mouse transcriptome in neuron-enriched brain tissues from the hippocampus and cerebellum during prion disease**

Anna Majer<sup>1,2</sup>, Sarah J. Medina<sup>1</sup>, Debra Sorensen<sup>1</sup>, Matthew Martin<sup>1,3</sup>, Kathy L. Frost<sup>1</sup>, Clark Phillipson<sup>1</sup>, Kathy Manguiat<sup>1</sup>, Stephanie A Booth<sup>1,3</sup>\*

1. Zoonotic Diseases and Special Pathogens, National Microbiology Laboratory, Canadian Science Centre for Human and Animal Health, Public Health Agency of Canada, Winnipeg, Manitoba, Canada
2. Viral Diseases, National Microbiology Laboratory, Canadian Science Centre for Human and Animal Health, Public Health Agency of Canada, Winnipeg, Manitoba, Canada
3. Department of Medical Microbiology and Infectious Diseases, College of Medicine, Faculty of Health Sciences, University of Manitoba, Winnipeg, Manitoba, Canada

\*Corresponding author

Dr. Stephanie Booth, Zoonotic Diseases and Special Pathogens, National Microbiology Laboratory, Canadian Science Centre for Human and Animal Health, Public Health Agency of Canada, Winnipeg, Manitoba, Canada; E-mail: [Stephanie.Booth@canada.ca](mailto:Stephanie.Booth@canada.ca) (SAB);  
Phone: +1 204 789 6031.

## Supplemental Figure 1. Bioanalyzer readings of representative samples microdissected from prion infected brain tissue.

RIN values indicating quality of the sample are depicted for the granular layer from (A) BSE and (B) RML infected mice. Samples collected from the CA1 hippocampal region for (C) BSE and (D) RML infected mice. The days post inoculation (DPI) time point is indicated for each samples in parentheses where EP represents the end-point of infection or terminal disease.

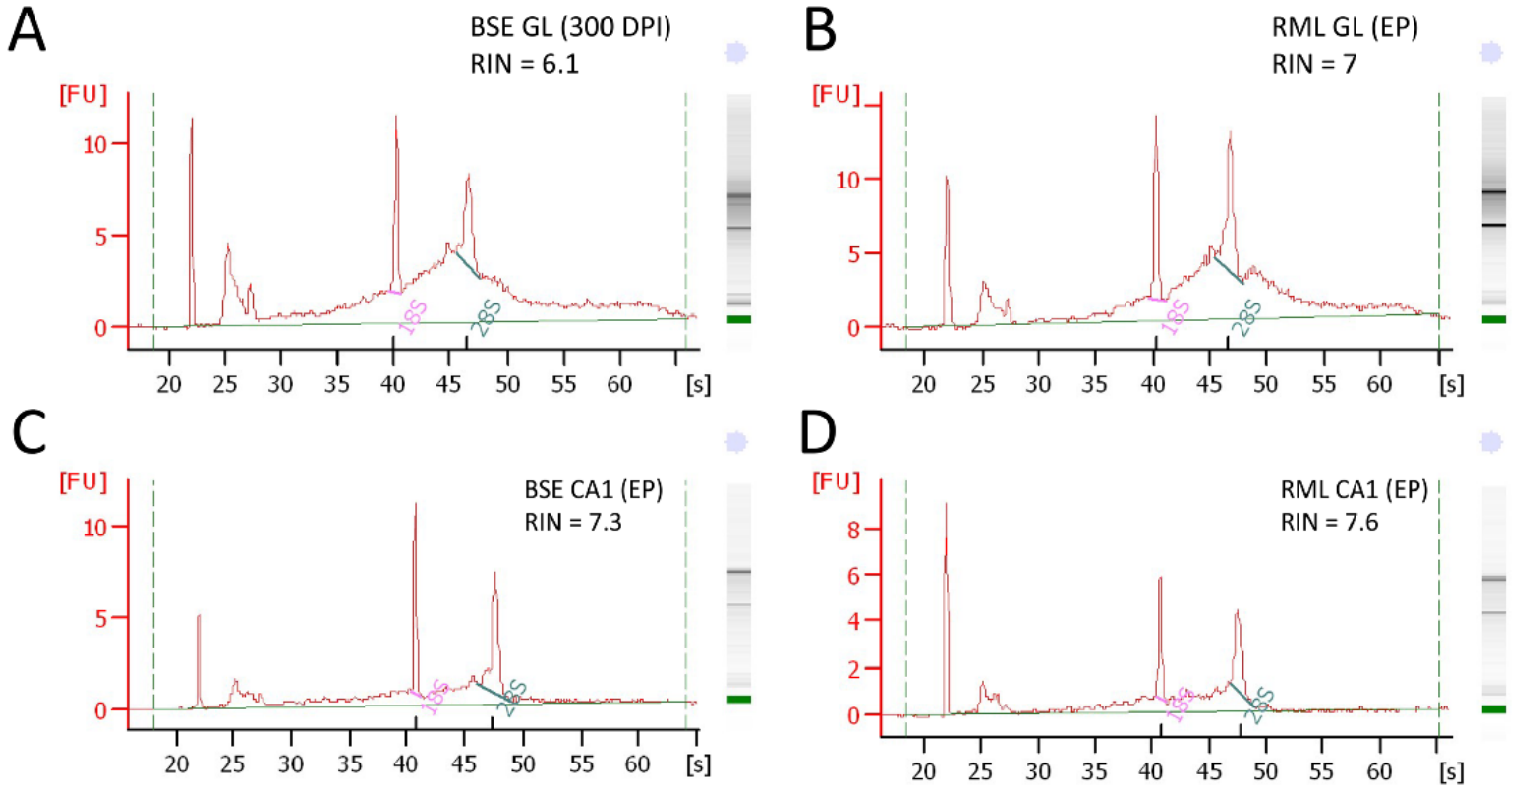

## Supplemental Figure 2. Relative signal intensities of IQGAP2 and PCP2 genes that are highly expressed in the hippocampal and cerebellum regions respectively.

We chose 2 genes that show highly enriched expression in either the hippocampus or cerebellum for technical validation of our microdissection and RNA extraction protocols. The relative signal intensities of two such genes, IQGAP2 and PCP2 are show; the mean log signal intensity values of the microarray probes for each of these genes is plotted for each sample type and time of sacrifice. The signal intensity threshold was set at 10 signal intensity units. IQGAP2 has been reported to be highly expressed in the CA, and PCP2 in the cerebellum and accordingly, the intensity of the array probes for IQGAP2 and PCP2 were at least a log higher in CA1 or cerebellum respectively. Allen Brain Atlas in situ hybridization images are provided to further illustrate this relationship (<http://mouse.brain-map.org/>)..

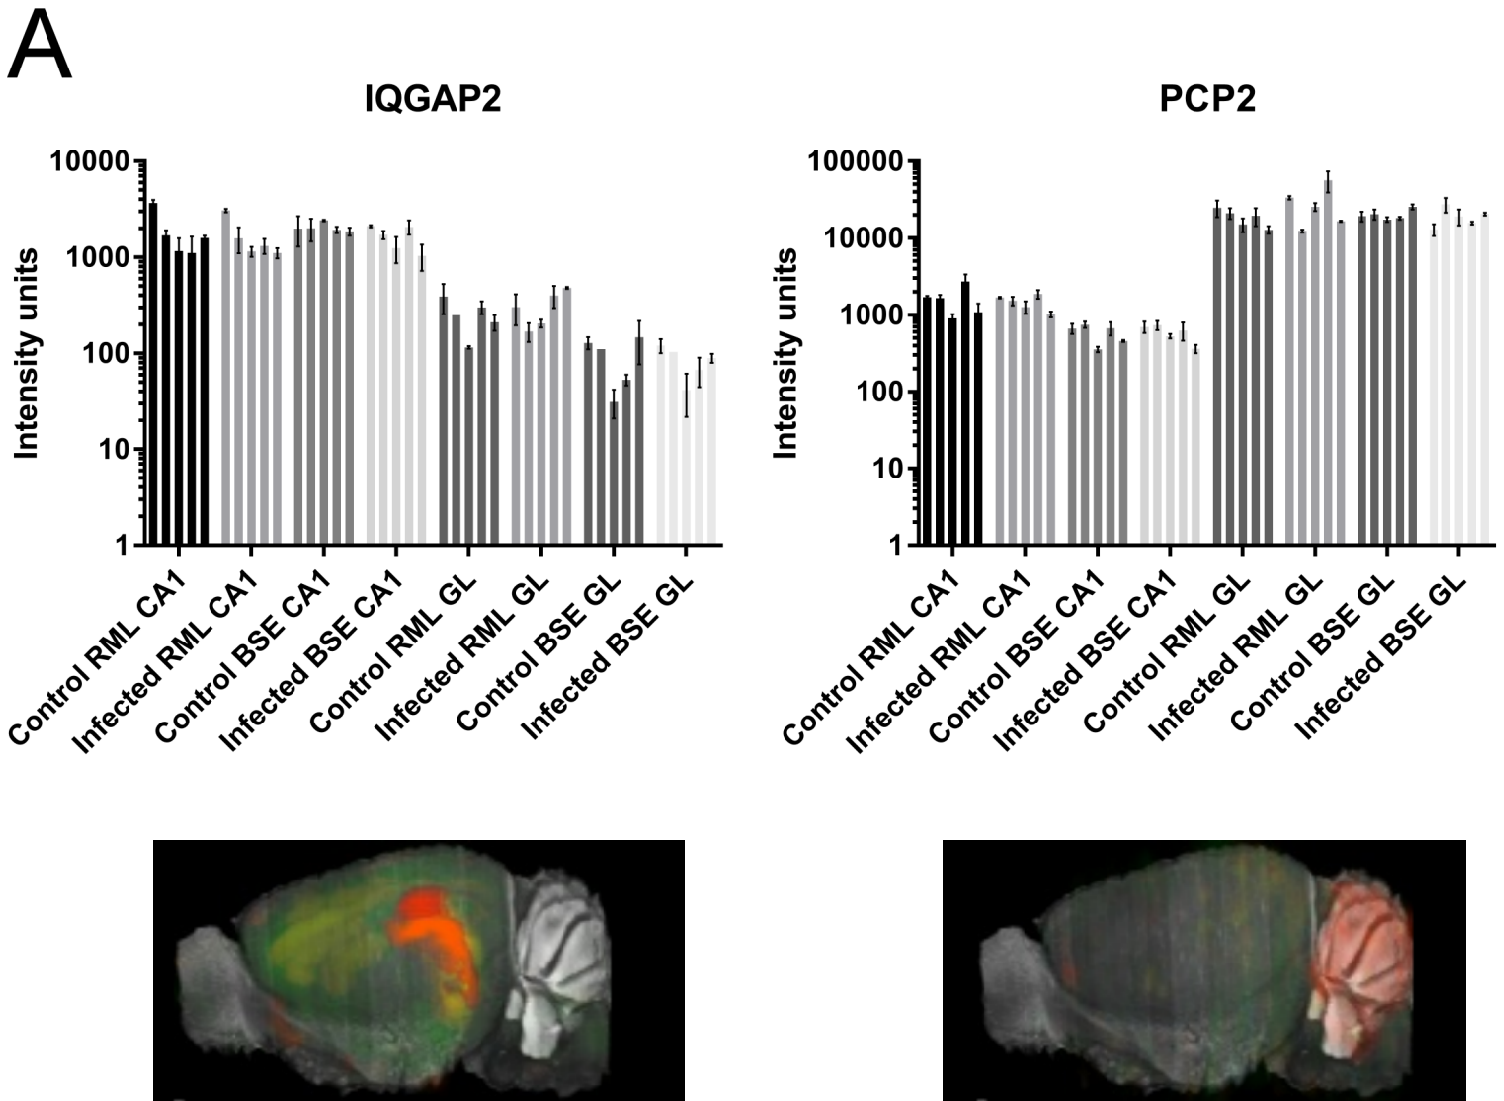

### Supplemental Figure 3. Relative gene expression levels of selected neuron, microglia astrocyte and oligodendrocyte markers in CA1 during RML scrapie infection.

We chose 4 'marker' genes that are frequently reported in the literature as being predominantly expressed either in neurons, microglia, astrocytes or oligodendrocytes. The intensity values from the microarray data was averaged for each experimental condition and plotted. This data serves to validate the experimental approach of microdissection to select regions of tissue that are enriched with neurons.

The bars represent log signal intensity values where light gray bars indicate infected samples while dark gray bars represent control levels for each specified gene. Significance was calculated by the Student's t-test where \* represents a p-value=0.05; \*\* reflects a p-value=0.01 and \*\*\* stands for a p-value=0.001. The x axes represent the incubation period of disease and time points are 70, 90, 110, 130 DPI and terminal, 153-161 DPI.

RML CA1

#### NEURON

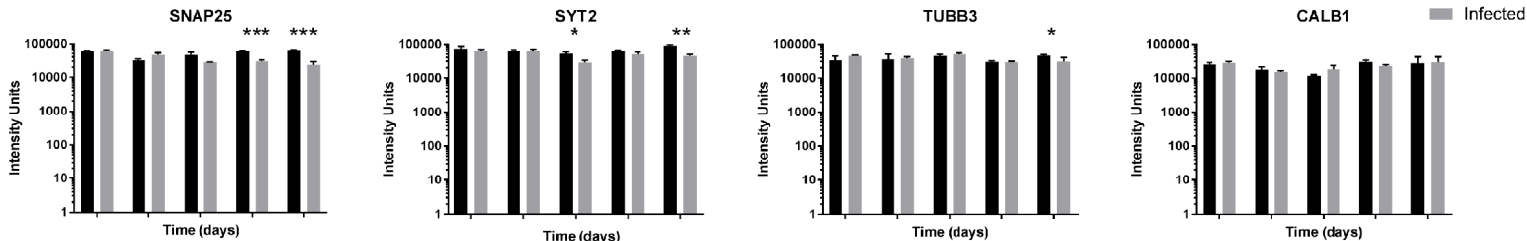

#### ASTROCYTE

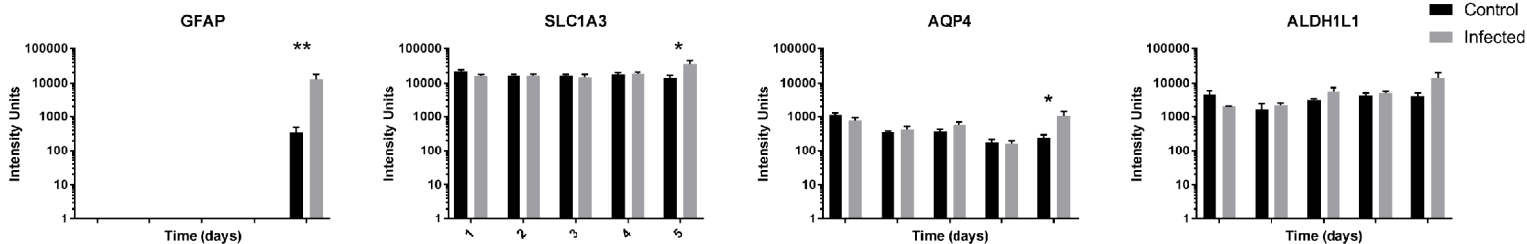

#### MICROGLIA

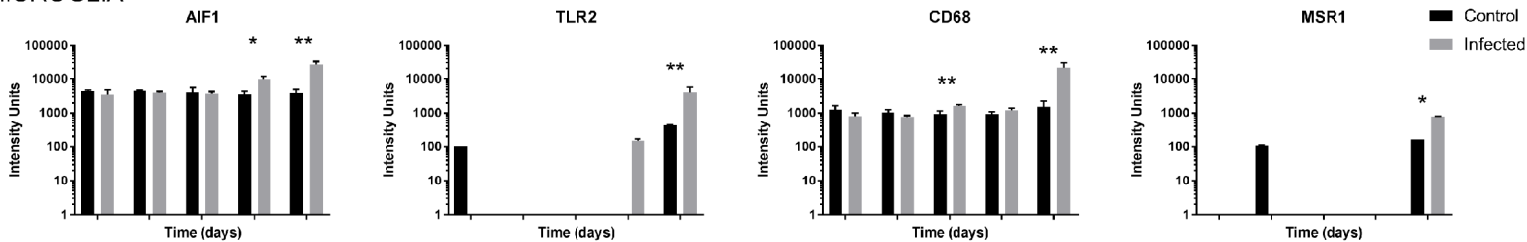

#### OLIGODENDROCYTE

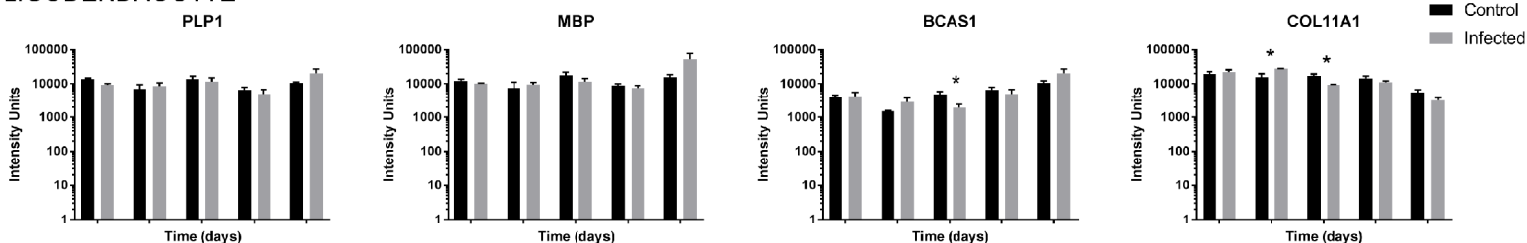

## Supplemental Figure 4. Relative gene expression levels of selected neuron, microglia astrocyte and oligodendrocyte markers in cerebellum during RML scrapie disease in mice.

We chose 4 'marker' genes that are frequently reported in the literature as being predominantly expressed either in neurons, microglia, astrocytes or oligodendrocytes. The intensity values from control and prion infected samples microdissected from the granule layer of the cerebellum region of mice infected with RML was plotted. This data serves to validate the experimental approach of microdissection to select regions of tissue that are enriched with neurons.

The bars represent log signal intensity values where light gray bars indicate infected samples while dark gray bars represent control levels for each specified gene. Significance was calculated by the Student's t-test where \* represents a p-value=0.05; \*\* reflects a p-value=0.01 and \*\*\* stands for a p-value=0.001. The x axes represent the incubation period of disease and time points are 70, 90, 110, 130 DPI and terminal, 153-161 DPI.

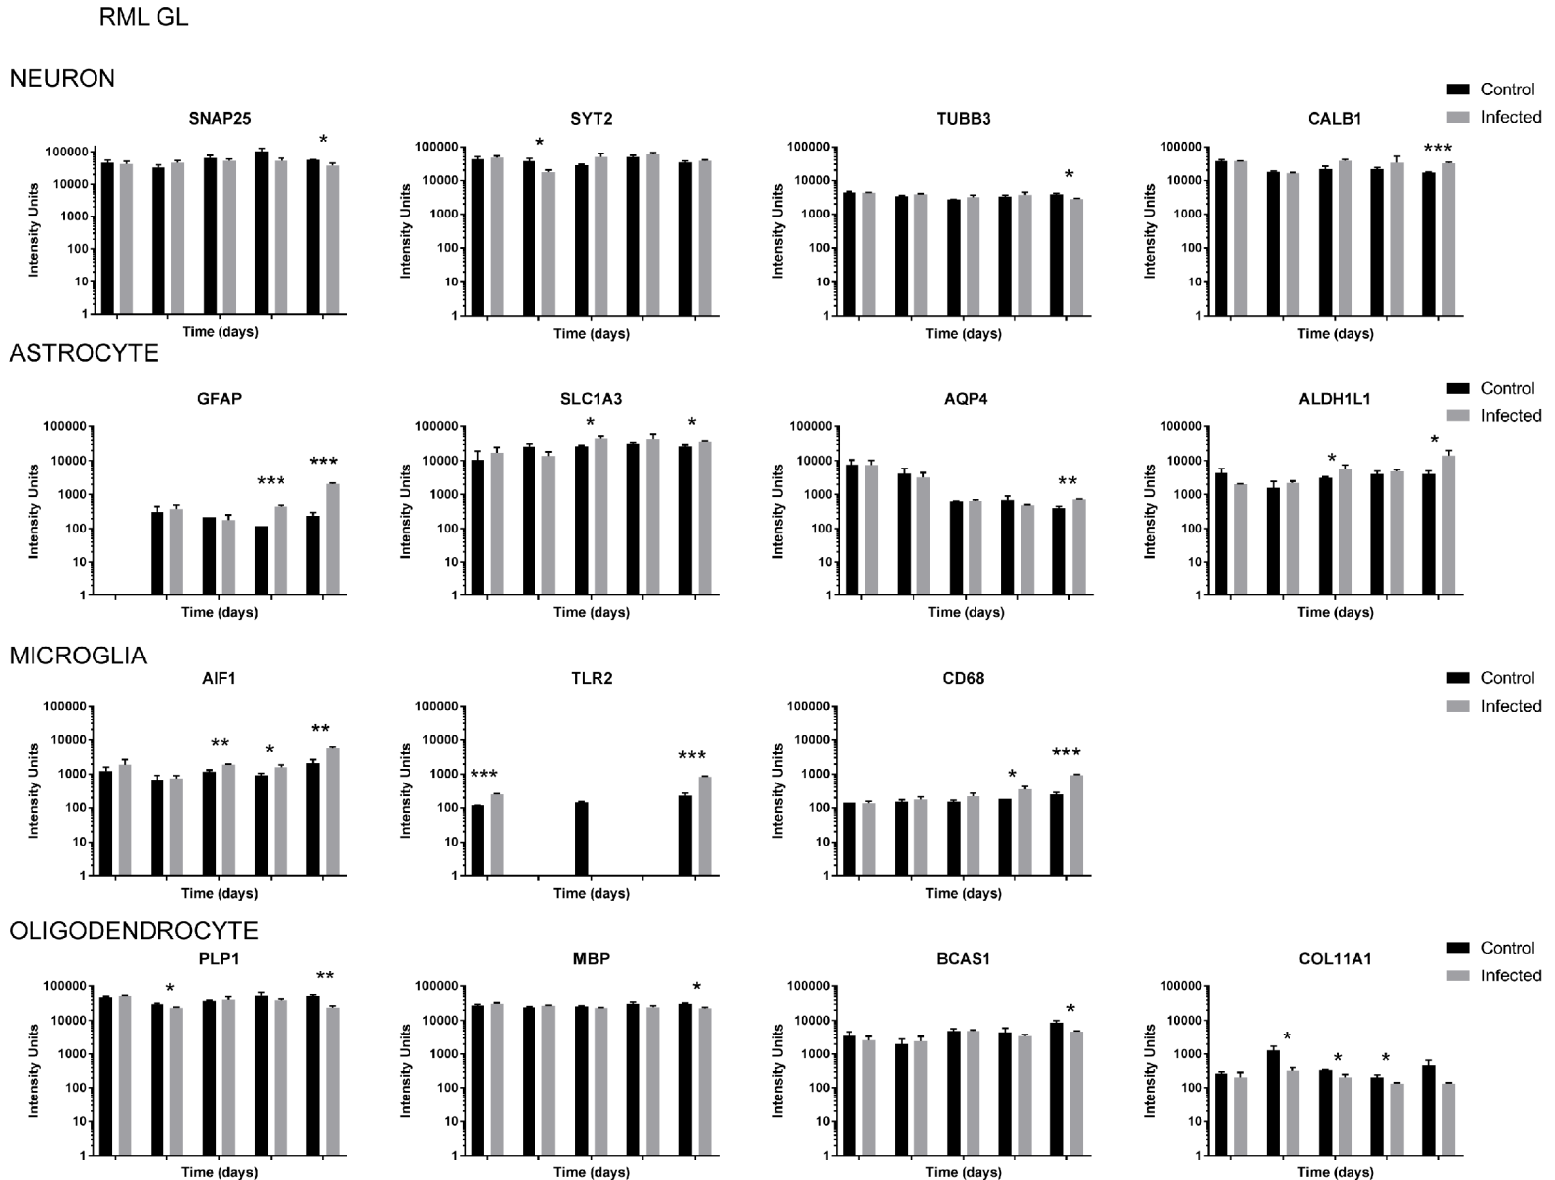

## Supplemental Figure 5. Relative gene expression levels of selected neuron, microglia astrocyte and oligodendrocyte markers in CA1 during BSE disease in mice.

We chose 4 ‘marker’ genes that are frequently reported in the literature as being predominantly expressed either in neurons, microglia, astrocytes or oligodendrocytes. The intensity values from control and prion infected samples microdissected from the hippocampal CA1 region of mice infected with BSE. was plotted. This data serves to validate the experimental approach of microdissection to select regions of tissue that are enriched with neurons.

The bars represent log signal intensity values where light gray bars indicate infected samples while dark gray bars represent control levels for each specified gene. Significance was calculated by the Student’s t-test where \* represents a p-value=0.05; \*\* reflects a p-value=0.01 and \*\*\* stands for a p-value=0.001. The x axes represent the incubation period of disease and time points are 60, 140, 200, 300 DPI and terminal, 304-390 DPI.

### BSE CA1

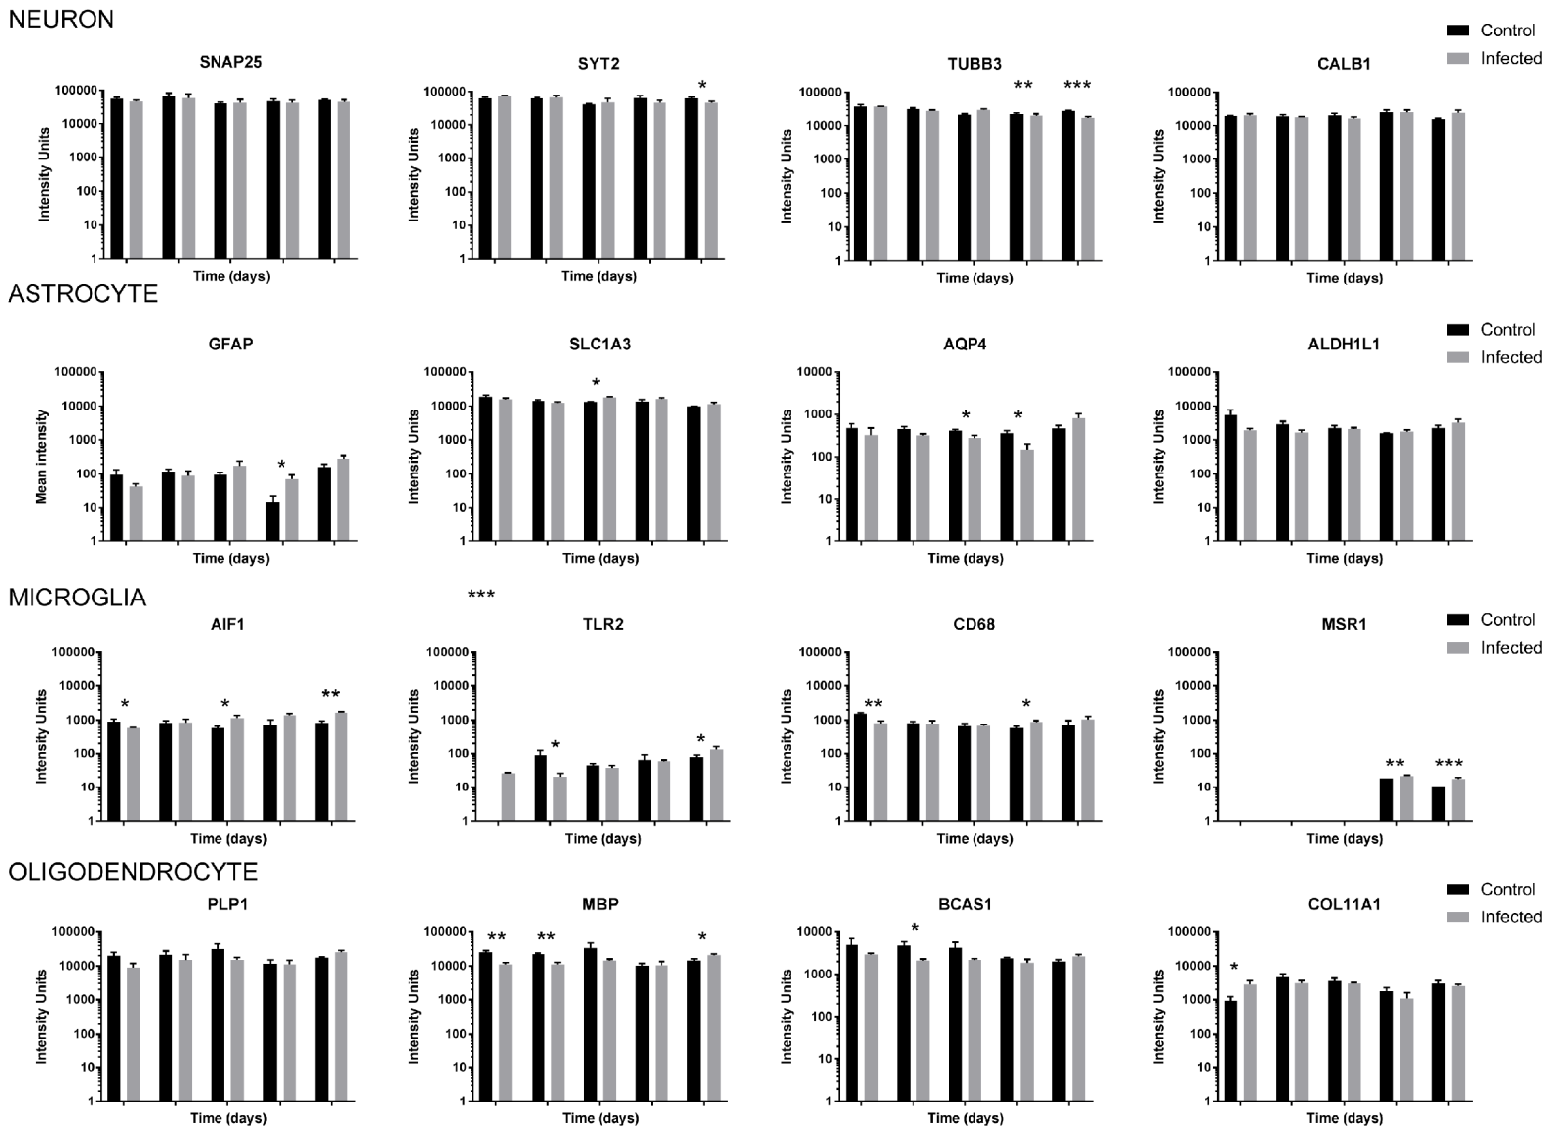

## Supplemental Figure 6. Relative gene expression levels of selected neuron, microglia astrocyte and oligodendrocyte markers in cerebellum during BSE disease in mice.

We chose 4 'marker' genes that are frequently reported in the literature as being predominantly expressed either in neurons, microglia, astrocytes or oligodendrocytes. The intensity values from control and prion infected samples microdissected from the granule layer of the cerebellum region of mice infected with BSE was plotted. This data serves to validate the experimental approach of microdissection to select regions of tissue that are enriched with neurons.

The bars represent log signal intensity values where light gray bars indicate infected samples while dark gray bars represent control levels for each specified gene. Significance was calculated by the Student's t-test where \* represents a p-value=0.05; \*\* reflects a p-value=0.01 and \*\*\* stands for a p-value=0.001. The x axes represent the incubation period of disease and time points are 60, 140, 200, 300 DPI and terminal, 304-390 DPI.

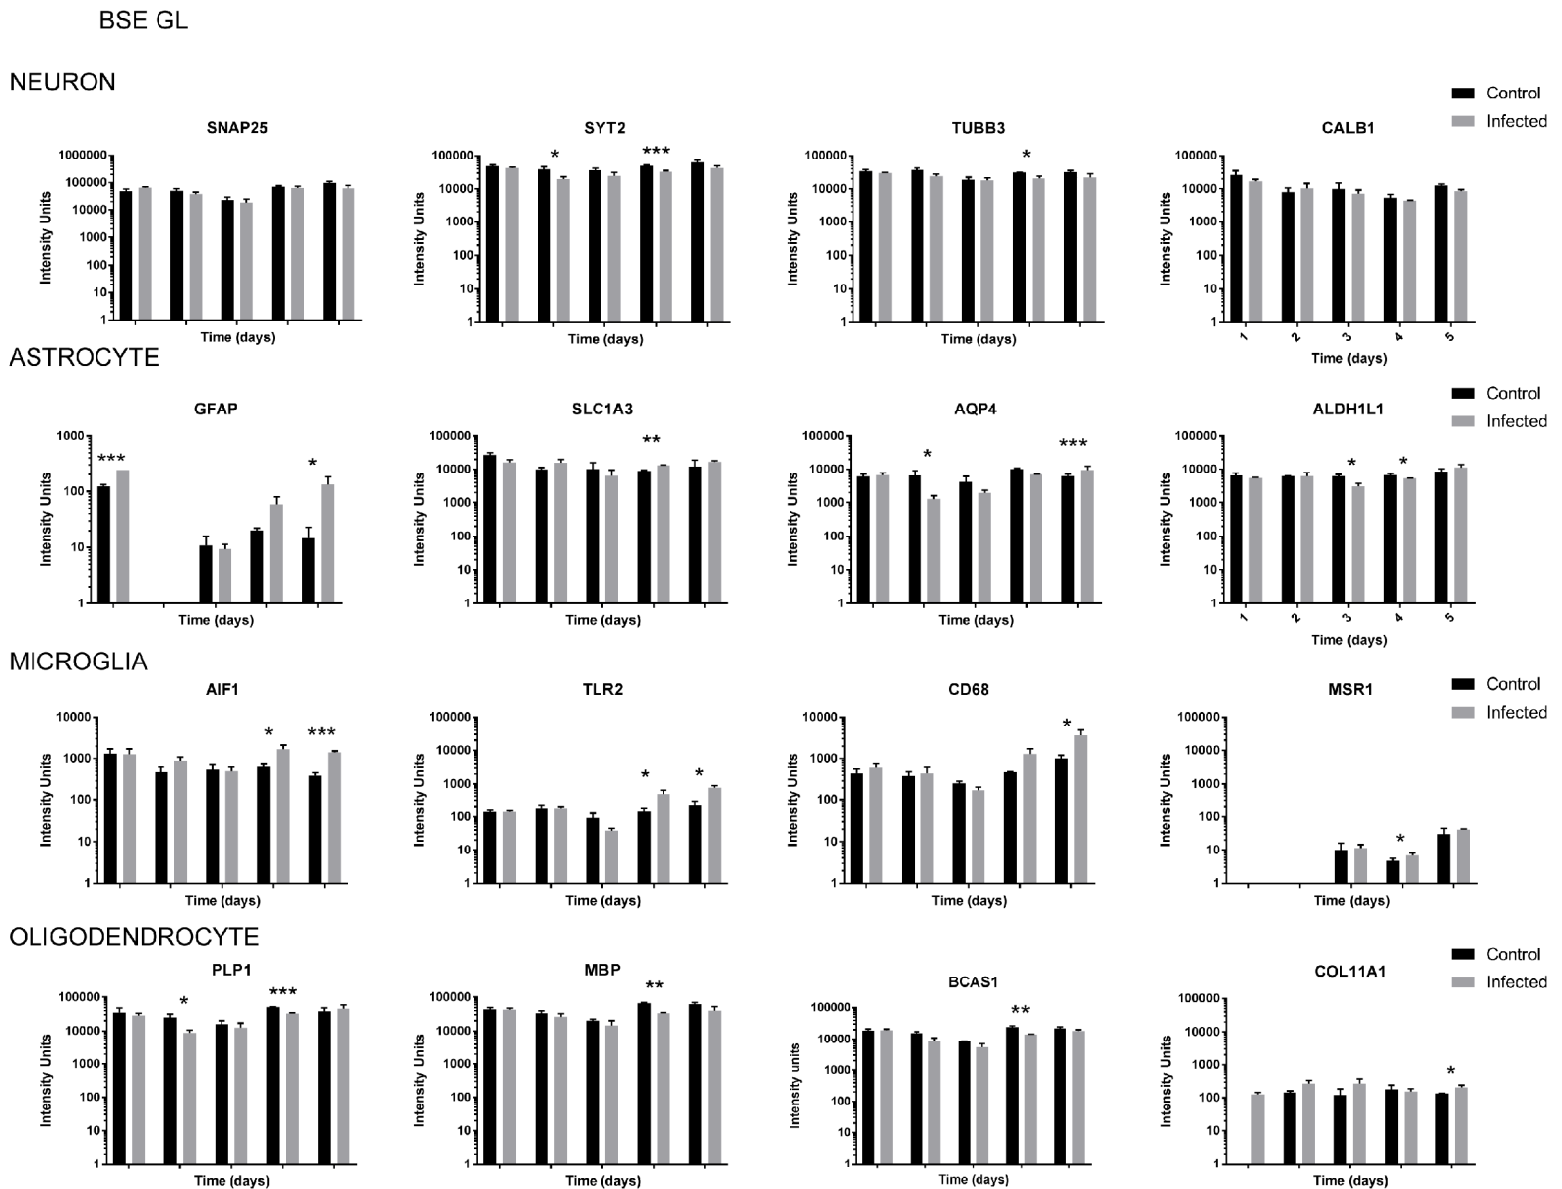

**Supplemental Table 1.** Genes with over 50% expression localised to astrocytes, microglia or neurons that also show altered expression profiles in microdissected CA1 and cerebellar granule region during the course of prion disease.

**ASTROCYTE List**

| Symbol        | Found in Hwang et al 2009 <sup>3</sup> DEG | Probe Name   | Gene Name                                            |
|---------------|--------------------------------------------|--------------|------------------------------------------------------|
| 2700046G09Rik |                                            | A_52_P324656 | RIKEN cDNA 2700046G09 gene                           |
| AASS          |                                            | A_51_P483544 | aminoadipate-semialdehyde synthase                   |
| ACTA2         |                                            | A_52_P420504 | actin, alpha 2, smooth muscle, aorta                 |
| ADRA2A        |                                            | A_52_P67493  | adrenoceptor alpha 2A                                |
| AHNAK         |                                            | A_52_P263095 | AHNAK nucleoprotein (desmoyokin)                     |
| ALDH1A1       |                                            | A_51_P334942 | aldehyde dehydrogenase 1 family, member A1           |
| ALDH1A2       |                                            | A_52_P58145  | aldehyde dehydrogenase 1 family, member A2           |
| ALDH1L1       | x                                          | A_51_P504546 | aldehyde dehydrogenase 1 family, member L1           |
| ALDOC         | x                                          | A_51_P425284 | aldolase C, fructose-bisphosphate                    |
| ANGPT1        | x                                          | A_51_P338443 | angiopoietin-like 4                                  |
| APOD          | x                                          | A_51_P366811 | apolipoprotein D                                     |
| AQP4          | x                                          | A_52_P625527 | aquaporin 4                                          |
| ARHGAP5       |                                            | A_52_P551909 | Rho GTPase activating protein 5                      |
| ARMC3         |                                            | A_51_P123546 | armadillo repeat containing 3                        |
| ATHL1         |                                            | A_51_P376789 | ATH1, acid trehalase-like 1 (yeast)                  |
| ATOH8         |                                            | A_51_P209736 | atonal bHLH transcription factor 8                   |
| BBS2          |                                            | A_51_P345196 | Bardet-Biedl syndrome 2                              |
| BCAR3         |                                            | A_51_P520936 | breast cancer anti-estrogen resistance 3             |
| BTBD7         |                                            | A_51_P330658 | BTB (POZ) domain containing 7                        |
| C1orf198      |                                            | A_52_P434556 | chromosome 1 open reading frame 198                  |
| C1QL3         |                                            | A_51_P367977 | complement component 1, q subcomponent-like 3        |
| C1QTNF5       |                                            | A_51_P373911 | C1q and tumor necrosis factor related protein 5      |
| C1R           |                                            | A_51_P384318 | complement component 1, r subcomponent               |
| C2orf40       |                                            | A_51_P404463 | chromosome 2 open reading frame 40                   |
| C4orf19       |                                            | A_51_P483617 | chromosome 4 open reading frame 19                   |
| C4orf22       |                                            | A_52_P418515 | chromosome 4 open reading frame 22                   |
| CALML4        |                                            | A_52_P367760 | calmodulin-like 4                                    |
| CAP2          |                                            | A_52_P148069 | CAP, adenylate cyclase-associated protein, 2 (yeast) |
| CAPN3         | x                                          | A_51_P423859 | calpain 3                                            |
| Casp12        | x                                          | A_51_P487518 | caspase 12                                           |
| CAV2          |                                            | A_51_P279552 | caveolin 2                                           |
| CCDC102A      |                                            | A_51_P138895 | coiled-coil domain containing 102A                   |
| CCDC103       |                                            | A_52_P405200 | coiled-coil domain containing 103                    |
| CCDC113       |                                            | A_51_P410576 | coiled-coil domain containing 113                    |
| CCDC78        |                                            | A_52_P446816 | coiled-coil domain containing 78                     |
| CCDC80        | x                                          | A_51_P248786 | coiled-coil domain containing 80                     |
| CCDC96        |                                            | A_51_P405129 | coiled-coil domain containing 96                     |
| CCPG1         |                                            | A_52_P585233 | cell cycle progression 1                             |
| CD164         |                                            | A_52_P220090 | CD164 antigen                                        |
| CD44          | x                                          | A_52_P523459 | CD44 antigen                                         |
| CD59          |                                            | A_52_P61691  | CD59b antigen                                        |
| CDC42EP4      |                                            | A_51_P323451 | CDC42 effector protein (Rho GTPase binding) 4        |
| CECR2         |                                            | A_52_P260468 | cat eye syndrome chromosome region, candidate 2      |
| CEP112        |                                            | A_52_P380114 | centrosomal protein 112kDa                           |
| CFI           |                                            | A_51_P496905 | complement factor I                                  |
| CGNL1         |                                            | A_51_P361678 | cingulin-like 1                                      |
| CHRD1         |                                            | A_52_P674808 | chordin-like 1                                       |
| CNTF          |                                            | A_51_P378967 | ciliary neurotrophic factor                          |
| COL3A1        |                                            | A_51_P515605 | collagen, type III, alpha 1                          |
| COL4A1        |                                            | A_51_P124254 | collagen, type IV, alpha 1                           |
| COL4A2        |                                            | A_52_P496142 | collagen, type IV, alpha 2                           |
| COL4A6        |                                            | A_52_P516409 | collagen, type IV, alpha 6                           |



|         |   |              |                                                            |
|---------|---|--------------|------------------------------------------------------------|
| COL6A1  |   | A_51_P474496 | collagen, type VI, alpha 1                                 |
| COL8A2  |   | A_52_P302544 | collagen, type VIII, alpha 2                               |
| COPZ2   |   | A_51_P230904 | coatomer protein complex, subunit zeta 2                   |
| CP      | x | A_52_P597002 | ceruloplasmin (ferroxidase)                                |
| CPNE2   |   | A_51_P261059 | copine II                                                  |
| CRB2    |   | A_51_P300618 | crumbs family member 2                                     |
| CRTC3   |   | A_51_P479598 | CREB regulated transcription coactivator 3                 |
| CTGF    |   | A_51_P157042 | connective tissue growth factor                            |
| CYBRD1  | x | A_52_P124734 | cytochrome b reductase 1                                   |
| CYP1B1  |   | A_51_P255456 | cytochrome P450, family 1, subfamily B, polypeptide 1      |
| Cyp2d22 |   | A_52_P478420 | cytochrome P450, family 2, subfamily d, polypeptide 22     |
| CYP39A1 |   | A_52_P557265 | cytochrome P450, family 39, subfamily A, polypeptide 1     |
| DAG1    |   | A_52_P419118 | dystroglycan 1 (dystrophin-associated glycoprotein 1)      |
| DCN     |   | A_51_P334104 | decorin                                                    |
| DDIT4L  |   | A_52_P311853 | DNA-damage-inducible transcript 4-like                     |
| DLK1    |   | A_51_P135618 | delta-like 1 homolog (Drosophila)                          |
| DMRTA2  |   | A_51_P110081 | DMRT-like family A2                                        |
| DNAJC3  |   | A_52_P264902 | DnaJ (Hsp40) homolog, subfamily C, member 3                |
| DNALI1  |   | A_52_P416046 | dynein, axonemal, light intermediate chain 1               |
| DRP2    |   | A_52_P92161  | dystrophin related protein 2                               |
| DTNA    |   | A_52_P108607 | dystrobrevin, alpha                                        |
| DUSP14  |   | A_51_P322677 | dual specificity phosphatase 14                            |
| DYNC2L1 |   | A_51_P472481 | dynein, cytoplasmic 2, light intermediate chain 1          |
| DYNLRB2 |   | A_51_P227962 | dynein, light chain, roadblock-type 2                      |
| DYSF    |   | A_52_P233801 | dysferlin                                                  |
| DYX1C1  |   | A_51_P332264 | dyslexia susceptibility 1 candidate 1                      |
| DZIP1L  |   | A_51_P199618 | DAZ interacting zinc finger protein 1-like                 |
| ECE2    |   | A_52_P271572 | endothelin converting enzyme 2                             |
| EFEMP1  | x | A_51_P337412 | EGF containing fibulin-like extracellular matrix protein 1 |
| EGLN3   |   | A_52_P387009 | egl-9 family hypoxia-inducible factor 3                    |
| EMP1    | x | A_52_P120037 | epithelial membrane protein 1                              |
| ENTPD2  | x | A_51_P112932 | ectonucleoside triphosphate diphosphohydrolase 2           |
| EVA1C   |   | A_52_P6070   | eva-1 homolog C (C. elegans)                               |
| F2R     |   | A_52_P344290 | coagulation factor II (thrombin) receptor                  |
| FAM71E1 |   | A_51_P323531 | family with sequence similarity 71, member E1              |
| FAM92B  |   | A_52_P26626  | family with sequence similarity 92, member B               |
| FAS     | x | A_51_P345393 | Fas cell surface death receptor                            |
| FBLN1   |   | A_52_P588483 | fibulin 1                                                  |
| FBLN5   |   | A_51_P186703 | fibulin 5                                                  |
| FBLN7   |   | A_52_P559817 | fibulin 7                                                  |
| FBXL7   |   | A_52_P290434 | F-box and leucine-rich repeat protein 7                    |
| FBXO30  |   | A_51_P223036 | F-box protein 30                                           |
| FGF1    |   | A_51_P148828 | fibroblast growth factor 1 (acidic)                        |
| FGL1    |   | A_51_P275905 | fibrinogen-like 1                                          |
| FLNB    |   | A_51_P446856 | filamin B, beta                                            |
| FOXC2   |   | A_51_P196444 | forkhead box C2                                            |
| FZD2    |   | A_51_P404077 | frizzled class receptor 2                                  |
| FZD6    |   | A_52_P217710 | frizzled class receptor 6                                  |
| GAREM   |   | A_51_P271439 | GRB2 associated, regulator of MAPK1                        |
| GCHFR   |   | A_51_P483159 | GTP cyclohydrolase I feedback regulator                    |
| GFAP    | x | A_52_P52303  | glial fibrillary acidic protein                            |
| GGCX    |   | A_52_P110812 | gamma-glutamyl carboxylase                                 |
| GJB2    |   | A_52_P382886 | gap junction protein, beta 2, 26kDa                        |
| GLB1L   |   | A_52_P504715 | galactosidase, beta 1-like                                 |
| GLI3    |   | A_51_P171288 | GLI family zinc finger 3                                   |
| GLIPR2  | x | A_51_P517843 | GLI pathogenesis-related 2                                 |
| Glycam1 |   | A_52_P602847 | glycosylation dependent cell adhesion molecule 1           |
| GNA14   |   | A_51_P110323 | guanine nucleotide binding protein (G protein), alpha 14   |
| GPR34   | x | A_52_P220275 | G protein-coupled receptor 34                              |
| GPRC5B  |   | A_51_P173709 | G protein-coupled receptor, class C, group 5, member B     |
| HDAC8   |   | A_52_P464062 | histone deacetylase 8                                      |
| HDC     |   | A_51_P254656 | histidine decarboxylase                                    |
| HIPK1   |   | A_52_P268687 | homeodomain interacting protein kinase 1                   |

|         |   |              |                                                                                      |
|---------|---|--------------|--------------------------------------------------------------------------------------|
| HSPA2   |   | A_51_P453149 | heat shock 70kDa protein 2                                                           |
| HSPB1   | x | A_52_P404533 | heat shock 27kDa protein 1                                                           |
| HSPB2   |   | A_52_P222624 | heat shock 27kDa protein 2                                                           |
| HSPB6   | x | A_51_P322022 | heat shock protein, alpha-crystallin-related, B6                                     |
| HSPB8   | x | A_51_P464387 | heat shock 22kDa protein 8                                                           |
| ID1     |   | A_51_P385786 | inhibitor of DNA binding 1, dominant negative helix-loop-helix protein               |
| ID3     | x | A_51_P380178 | inhibitor of DNA binding 3, dominant negative helix-loop-helix protein               |
| IFT74   |   | A_52_P136966 | intraflagellar transport 74                                                          |
| IGF2    |   | A_51_P516826 | insulin-like growth factor 2                                                         |
| IGFBP2  |   | A_51_P423308 | insulin-like growth factor binding protein 2, 36kDa                                  |
| IGFBP5  |   | A_52_P281702 | insulin-like growth factor binding protein 5                                         |
| IGFBP6  |   | A_51_P374571 | insulin-like growth factor binding protein 6                                         |
| IGFBP7  |   | A_51_P472292 | insulin-like growth factor binding protein 7                                         |
| IGSF1   |   | A_51_P366157 | immunoglobulin superfamily, member 1                                                 |
| IKZF2   | x | A_52_P413515 | IKAROS family zinc finger 2 (Helios)                                                 |
| IL17RD  |   | A_51_P253732 | interleukin 17 receptor D                                                            |
| IL1R2   |   | A_51_P470079 | interleukin 1 receptor, type II                                                      |
| IL4I1   |   | A_52_P410449 | interleukin 4 induced 1                                                              |
| INMT    |   | A_51_P162162 | indolethylamine N-methyltransferase                                                  |
| IQCG    |   | A_51_P152550 | IQ motif containing G                                                                |
| IQGAP2  |   | A_52_P65496  | IQ motif containing GTPase activating protein 2                                      |
| ISLR    |   | A_51_P140742 | immunoglobulin superfamily containing leucine-rich repeat                            |
| ITGB4   |   | A_52_P143287 | integrin, beta 4                                                                     |
| ITIH5   |   | A_51_P364250 | inter-alpha-trypsin inhibitor heavy chain family, member 5                           |
| KCNE5   | x | A_51_P160673 | potassium channel, voltage gated subfamily E regulatory beta subunit 5               |
| KDR     |   | A_51_P316553 | kinase insert domain receptor                                                        |
| KLF2    |   | A_51_P144264 | Kruppel-like factor 2                                                                |
| KLF5    |   | A_51_P507290 | Kruppel-like factor 5                                                                |
| L3HYPDH |   | A_51_P408989 | L-3-hydroxyproline dehydratase (trans-)                                              |
| LAMB2   |   | A_51_P248044 | laminin, beta 2 (laminin S)                                                          |
| LBP     |   | A_51_P454008 | lipopolysaccharide binding protein                                                   |
| LIX1    |   | A_52_P329443 | limb and CNS expressed 1                                                             |
| LMCD1   | x | A_51_P405912 | LIM and cysteine-rich domains 1                                                      |
| LPAR4   |   | A_52_P438036 | lysophosphatidic acid receptor 4                                                     |
| LRRC56  |   | A_51_P484200 | leucine rich repeat containing 56                                                    |
| LUM     |   | A_51_P167527 | lumican                                                                              |
| MAFF    |   | A_52_P608322 | v-maf avian musculoaponeurotic fibrosarcoma oncogene homolog F                       |
| MAMDC2  |   | A_51_P451458 | MAM domain containing 2                                                              |
| MDH1B   |   | A_51_P227077 | malate dehydrogenase 1B, NAD (soluble)                                               |
| MEDAG   |   | A_52_P3276   | mesenteric estrogen-dependent adipogenesis                                           |
| MEST    |   | A_51_P124535 | mesoderm specific transcript                                                         |
| MFI2    |   | A_51_P324351 | antigen p97 (melanoma associated) identified by monoclonal antibodies 133.2 and 96.5 |
| MGST1   | x | A_52_P549827 | microsomal glutathione S-transferase 1                                               |
| MIA     |   | A_52_P415167 | melanoma inhibitory activity                                                         |
| MLF1    |   | A_51_P205106 | myeloid leukemia factor 1                                                            |
| MME     |   | A_52_P429723 | membrane metallo-endopeptidase                                                       |
| MMP11   |   | A_51_P293087 | matrix metallopeptidase 11                                                           |
| MMP14   |   | A_52_P304128 | matrix metallopeptidase 14 (membrane-inserted)                                       |
| MMP2    |   | A_51_P341736 | matrix metallopeptidase 2                                                            |
| MNS1    |   | A_51_P100174 | meiosis-specific nuclear structural 1                                                |
| MORN1   |   | A_51_P423825 | MORN repeat containing 1                                                             |
| MR1     |   | A_52_P212429 | major histocompatibility complex, class I-related                                    |
| MRO     |   | A_52_P601230 | maestro                                                                              |
| Mt1     | x | A_51_P294979 | metallothionein 1                                                                    |
| Mt2     | x | A_51_P246317 | metallothionein 2                                                                    |
| MTMR11  | x | A_52_P350537 | myotubularin related protein 11                                                      |
| NEDD9   |   | A_52_P491544 | neural precursor cell expressed, developmentally down-regulated 9                    |
| NEXN    |   | A_52_P367520 | nexilin (F actin binding protein)                                                    |
| NFIA    |   | A_52_P120680 | nuclear factor I/A                                                                   |
| NID1    |   | A_51_P339943 | nidogen 1                                                                            |
| NPR2    |   | A_52_P565549 | natriuretic peptide receptor 2                                                       |
| NR2F2   |   | A_52_P620399 | nuclear receptor subfamily 2, group F, member 2                                      |

|          |   |              |                                                                                                        |
|----------|---|--------------|--------------------------------------------------------------------------------------------------------|
| NTRK2    |   | A_51_P516006 | neurotrophic tyrosine kinase, receptor, type 2                                                         |
| NXN      |   | A_52_P57013  | nucleoredoxin                                                                                          |
| OGN      |   | A_51_P295085 | osteoglycin                                                                                            |
| OSBPL3   |   | A_52_P360308 | oxysterol binding protein-like 3                                                                       |
| OSMR     | x | A_51_P319460 | oncostatin M receptor                                                                                  |
| PAMR1    |   | A_51_P212592 | peptidase domain containing associated with muscle regeneration 1                                      |
| PARD6B   |   | A_52_P37123  | par-6 family cell polarity regulator beta                                                              |
| PAX6     |   | A_51_P489935 | paired box 6                                                                                           |
| PCOLCE   |   | A_51_P371942 | procollagen C-endopeptidase enhancer                                                                   |
| PDLIM1   |   | A_51_P461138 | PDZ and LIM domain 1                                                                                   |
| PDLIM7   |   | A_52_P21574  | PDZ and LIM domain 7 (enigma)                                                                          |
| PDP1     |   | A_51_P452637 | pyruvate dehydrogenase phosphatase catalytic subunit 1                                                 |
| PIK3IP1  |   | A_51_P463428 | phosphoinositide-3-kinase interacting protein 1                                                        |
| PLAGL1   |   | A_52_P532456 | pleiomorphic adenoma gene-like 1                                                                       |
| PLCD4    | x | A_52_P327588 | phospholipase C, delta 4                                                                               |
| Plscr2   | x | A_52_P372901 | phospholipid scramblase 2                                                                              |
| PPM1K    |   | A_51_P265219 | protein phosphatase, Mg <sup>2+</sup> /Mn <sup>2+</sup> dependent, 1K                                  |
| PPP1R3C  |   | A_52_P30451  | protein phosphatase 1, regulatory subunit 3C                                                           |
| PRDX6    | x | A_51_P496023 | peroxiredoxin 6                                                                                        |
| PRKCDBP  | x | A_51_P180974 | protein kinase C, delta binding protein                                                                |
| PRRX2    |   | A_51_P183746 | paired related homeobox 2                                                                              |
| PRSS23   |   | A_52_P679105 | protease, serine, 23                                                                                   |
| PRTG     |   | A_51_P483639 | protogenin                                                                                             |
| PTER     |   | A_51_P251069 | phosphotriesterase related                                                                             |
| PYGB     |   | A_51_P485810 | phosphorylase, glycogen; brain                                                                         |
| RAMP1    |   | A_51_P348665 | receptor (G protein-coupled) activity modifying protein 1                                              |
| RAPGEF3  | x | A_51_P116906 | Rap guanine nucleotide exchange factor (GEF) 3                                                         |
| RARRES2  |   | A_52_P466147 | retinoic acid receptor responder (tazarotene induced) 2                                                |
| RASL11A  |   | A_51_P340699 | RAS-like, family 11, member A                                                                          |
| RBP1     | x | A_51_P423484 | retinol binding protein 1, cellular                                                                    |
| RDH10    |   | A_52_P59318  | retinol dehydrogenase 10 (all-trans)                                                                   |
| RDH5     |   | A_51_P479618 | retinol dehydrogenase 5 (11-cis/9-cis)                                                                 |
| RGS20    |   | A_51_P424690 | regulator of G-protein signaling 20                                                                    |
| RHOD     |   | A_51_P452953 | ras homolog family member D                                                                            |
| RHOJ     | x | A_52_P592466 | ras homolog family member J                                                                            |
| RIBC1    |   | A_51_P217706 | RIB43A domain with coiled-coils 1                                                                      |
| S100A6   | x | A_51_P281089 | S100 calcium binding protein A6                                                                        |
| SCNN1A   |   | A_51_P213691 | sodium channel, non voltage gated 1 alpha subunit                                                      |
| SERPINF1 |   | A_51_P517075 | serpin peptidase inhibitor, clade F (alpha-2 antiplasmin, pigment epithelium derived factor), member 1 |
| SERPING1 | x | A_51_P376238 | serpin peptidase inhibitor, clade G (C1 inhibitor), member 1                                           |
| SESN3    |   | A_51_P246773 | sestrin 3                                                                                              |
| SFT2D2   |   | A_51_P103780 | SFT2 domain containing 2                                                                               |
| SLC12A8  |   | A_51_P476618 | solute carrier family 12, member 8                                                                     |
| SLC13A4  |   | A_51_P514319 | solute carrier family 13 (sodium/sulfate symporter), member 4                                          |
| SLC25A18 | x | A_51_P507664 | solute carrier family 25 (glutamate carrier), member 18                                                |
| SLC2A4   |   | A_51_P217498 | solute carrier family 2 (facilitated glucose transporter), member 4                                    |
| SLC4A4   |   | A_52_P457567 | solute carrier family 4 (sodium bicarbonate cotransporter), member 4                                   |
| SLC6A13  |   | A_51_P438083 | solute carrier family 6 (neurotransmitter transporter), member 13                                      |
| SLCO2B1  | x | A_52_P255782 | solute carrier organic anion transporter family, member 2B1                                            |
| SMAD3    |   | A_52_P352277 | SMAD family member 3                                                                                   |
| SOCS3    | x | A_51_P474459 | suppressor of cytokine signaling 3                                                                     |
| SORBS1   |   | A_52_P652999 | sorbin and SH3 domain containing 1                                                                     |
| SOX9     | x | A_52_P577484 | SRY (sex determining region Y)-box 9                                                                   |
| SPARC    |   | A_51_P431087 | secreted protein, acidic, cysteine-rich (osteonectin)                                                  |
| SPATA1   |   | A_51_P374549 | spermatogenesis associated 1                                                                           |
| SPATS2L  |   | A_52_P538470 | spermatogenesis associated, serine-rich 2-like                                                         |
| STEAP2   |   | A_52_P129456 | STEAP family member 2, metalloreductase                                                                |
| STK36    |   | A_51_P487157 | serine/threonine kinase 36                                                                             |
| STXBP4   |   | A_52_P835711 | syntaxin binding protein 4                                                                             |
| SULF1    | x | A_51_P142744 | sulfatase 1                                                                                            |
| Sult1a1  |   | A_51_P321341 | sulfotransferase family 1A, phenol-preferring, member 1                                                |
| SYNPO    | x | A_51_P123676 | synaptopodin                                                                                           |

|          |   |              |                                                          |
|----------|---|--------------|----------------------------------------------------------|
| SYNPO2   |   | A_51_P119776 | synaptopodin 2                                           |
| TAGLN    | x | A_52_P517683 | transgelin                                               |
| TEKT1    |   | A_51_P328890 | tektin 1                                                 |
| TEX9     |   | A_52_P242293 | testis expressed 9                                       |
| TFCP2L1  | x | A_52_P175376 | transcription factor CP2-like 1                          |
| TGIF2    | x | A_51_P456657 | TGFB-induced factor homeobox 2                           |
| TGM2     | x | A_52_P220879 | transglutaminase 2                                       |
| TIMP2    | x | A_52_P540219 | TIMP metalloproteinase inhibitor 2                       |
| TM4SF1   | x | A_51_P240614 | transmembrane 4 L six family member 1                    |
| TMEM132B |   | A_52_P38908  | transmembrane protein 132B                               |
| TMEM53   |   | A_51_P441837 | transmembrane protein 53                                 |
| TPBG     |   | A_52_P591017 | trophoblast glycoprotein                                 |
| Tpm2     |   | A_52_P418477 | tropomyosin 2, beta                                      |
| TPPP3    | x | A_51_P246924 | tubulin polymerization-promoting protein family member 3 |
| TST      |   | A_51_P430082 | thiosulfate sulfurtransferase (rhodanese)                |
| VANGL1   |   | A_52_P449417 | VANGL planar cell polarity protein 1                     |
| VCAM1    | x | A_51_P210956 | vascular cell adhesion molecule 1                        |
| VIM      | x | A_51_P392687 | vimentin                                                 |
| WDPCP    |   | A_52_P129443 | WD repeat containing planar cell polarity effector       |
| WNT5A    |   | A_52_P250865 | wingless-type MMTV integration site family, member 5A    |
| WNT9A    |   | A_51_P375453 | wingless-type MMTV integration site family, member 9A    |
| WWTR1    |   | A_51_P502608 | WW domain containing transcription regulator 1           |
| ZBTB20   |   | A_52_P54169  | zinc finger and BTB domain containing 20                 |
| ZFYVE21  |   | A_51_P396917 | zinc finger, FYVE domain containing 21                   |
| ZNF395   |   | A_52_P632691 | zinc finger protein 395                                  |
| ZNF521   |   | A_51_P214985 | zinc finger protein 521                                  |

#### **MICROGLIA list**

| Symbol   | Hwang DEG | Agilent      | Entrez Gene Name                                                                    |
|----------|-----------|--------------|-------------------------------------------------------------------------------------|
| ABCC1    |           | A_52_P491507 | ATP-binding cassette, sub-family C (CFTR/MRP), member 1                             |
| ACACB    |           | A_51_P239236 | acetyl-Coenzyme A carboxylase beta                                                  |
| ACVRL1   |           | A_52_P279329 | activin A receptor, type II-like 1                                                  |
| ADA      |           | A_51_P430423 | adenosine deaminase                                                                 |
| ADAM33   |           | A_52_P333567 | a disintegrin and metalloproteinase domain 33                                       |
| ADAM8    |           | A_51_P319917 | a disintegrin and metalloproteinase domain 8                                        |
| ADCY7    | x         | A_52_P586141 | adenylate cyclase 7                                                                 |
| AFP      | x         | A_51_P510891 | alpha fetoprotein                                                                   |
| AIF1     | x         | A_52_P2754   | allograft inflammatory factor 1                                                     |
| AKAP13   |           | A_51_P452702 | A kinase (PRKA) anchor protein 13                                                   |
| ANGPT2   | x         | A_51_P201982 | angiopoietin 2                                                                      |
| ANTXR1   | x         | A_51_P407248 | anthrax toxin receptor 2                                                            |
| ANXA3    | x         | A_51_P283590 | annexin A1                                                                          |
| ANXA4    | x         | A_51_P256342 | annexin A4                                                                          |
| APBB1IP  |           | A_51_P391904 | amyloid beta (A4) precursor protein-binding, family B, member 1 interacting protein |
| APOBEC1  |           | A_51_P160754 | apolipoprotein B mRNA editing enzyme, catalytic polypeptide 1                       |
| ARAP3    |           | A_52_P195018 | ArfGAP with RhoGAP domain, ankyrin repeat and PH domain 3                           |
| ARHGAP25 | x         | A_51_P248629 | Rho GTPase activating protein 25                                                    |
| ARHGAP30 |           | A_51_P291227 | Rho GTPase activating protein 30                                                    |
| ARL5C    |           | A_52_P203691 | ADP-ribosylation factor-like 5C                                                     |
| B2M      | x         | A_51_P129006 | beta-2 microglobulin                                                                |
| B4GALT1  |           | A_52_P103391 | UDP-Gal:betaGlcNAc beta 1,4- galactosyltransferase, polypeptide 1                   |
| BCL2A1   | x         | A_51_P494241 | B-cell leukemia/lymphoma 2 related protein A1b                                      |
| BIRC5    |           | A_51_P230103 | baculoviral IAP repeat-containing 5                                                 |
| BLNK     | x         | A_51_P279841 | B-cell linker                                                                       |
| BLVRA    |           | A_51_P363103 | biliverdin reductase A                                                              |
| BMP2K    | x         | A_51_P337944 | predicted gene 4521; BMP2 inducible kinase                                          |
| BTK      |           | A_51_P145883 | Bruton agammaglobulinemia tyrosine kinase                                           |
| C10orf11 |           | A_51_P346874 | RIKEN cDNA 1700112E06 gene                                                          |
| C10orf54 | x         | A_51_P372992 | RIKEN cDNA 4632428N05 gene                                                          |
| C1QA     | x         | A_51_P181451 | complement component 1, q subcomponent, alpha polypeptide                           |

|               |   |              |                                                                                                       |
|---------------|---|--------------|-------------------------------------------------------------------------------------------------------|
| C1QC          | x | A_51_P102789 | complement component 1, q subcomponent, C chain                                                       |
| CA13          |   | A_51_P153765 | carbonic anhydrase 13                                                                                 |
| CAPG          | x | A_51_P273921 | capping protein (actin filament), gelsolin-like                                                       |
| CASP1         | x | A_51_P142861 | caspase 1                                                                                             |
| CASP4         |   | A_51_P511787 | caspase 4, apoptosis-related cysteine peptidase                                                       |
| CASP8         | x | A_51_P247799 | caspase 8                                                                                             |
| CAST          |   | A_51_P519295 | calpastatin                                                                                           |
| CCDC88B       |   | A_52_P322141 | coiled-coil domain containing 88B                                                                     |
| CCL2          | x | A_52_P249514 | chemokine (C-C motif) ligand 12; similar to monocyte chemoattractant protein-5                        |
| Ccl2          | x | A_51_P286737 | chemokine (C-C motif) ligand 2                                                                        |
| CCL3L3        | x | A_51_P140710 | chemokine (C-C motif) ligand 3                                                                        |
| CCL4          |   | A_51_P509573 | chemokine (C-C motif) ligand 4                                                                        |
| CCL5          | x | A_51_P485312 | chemokine (C-C motif) ligand 5                                                                        |
| Ccl6          | x | A_51_P460954 | chemokine (C-C motif) ligand 6                                                                        |
| Ccl9          | x | A_51_P185660 | chemokine (C-C motif) ligand 9                                                                        |
| CCRL2         |   | A_51_P232682 | chemokine (C-C motif) receptor-like 2                                                                 |
| CD14          | x | A_51_P172853 | CD14 antigen                                                                                          |
| CD300A        |   | A_52_P492142 | CD300A antigen                                                                                        |
| CD300C        | x | A_51_P484020 | cDNA sequence AF251705                                                                                |
| CD300LF       |   | A_52_P422494 | CD300 antigen like family member F                                                                    |
| CD48          | x | A_51_P362029 | CD48 antigen                                                                                          |
| Cd52          | x | A_51_P151126 | CD52 antigen                                                                                          |
| CD53          | x | A_51_P337675 | CD53 antigen                                                                                          |
| CD68          | x | A_51_P120470 | CD68 antigen                                                                                          |
| CD74          | x | A_51_P284608 | CD74 antigen (invariant polypeptide of major histocompatibility complex, class II antigen-associated) |
| CD84          | x | A_51_P369550 | CD84 antigen                                                                                          |
| CD86          | x | A_51_P174723 | CD86 antigen                                                                                          |
| CDT1          |   | A_51_P133612 | chromatin licensing and DNA replication factor 1                                                      |
| CEBPA         | x | A_52_P168567 | CCAAT/enhancer binding protein (C/EBP), alpha                                                         |
| CEBPB         | x | A_52_P63553  | CCAAT/enhancer binding protein (C/EBP), beta                                                          |
| CELSR1        |   | A_51_P440743 | cadherin, EGF LAG seven-pass G-type receptor 1 (flamingo homolog, Drosophila)                         |
| CFLAR         |   | A_51_P326091 | CASP8 and FADD-like apoptosis regulator pseudogene; CASP8 and FADD-like apoptosis regulator           |
| CH25H         | x | A_51_P112966 | cholesterol 25-hydroxylase                                                                            |
| CKLF          | x | A_51_P394715 | chemokine-like factor                                                                                 |
| Clec2d        |   | A_51_P324690 | C-type lectin domain family 2, member d                                                               |
| Clec4a3       | x | A_51_P147274 | C-type lectin domain family 4, member a3                                                              |
| CLEC5A        | x | A_52_P218058 | C-type lectin domain family 5, member a                                                               |
| CLEC7A        | x | A_51_P246653 | C-type lectin domain family 7, member a                                                               |
| CLIC1         | x | A_51_P357341 | chloride intracellular channel 1                                                                      |
| CMTM7         | x | A_51_P377833 | CKLF-like MARVEL transmembrane domain containing 7                                                    |
| CSF1R         | x | A_52_P602091 | colony stimulating factor 1 receptor                                                                  |
| CSF2RB        | x | A_51_P146753 | colony stimulating factor 2 receptor, beta 2, low-affinity (granulocyte-macrophage)                   |
| CSF3R         | x | A_51_P515639 | predicted gene 4223; similar to Csf3r protein; colony stimulating factor 3 receptor (granulocyte)     |
| CST7          | x | A_51_P137419 | cystatin F (leukocystatin)                                                                            |
| CSTA          | x | A_51_P384894 | cystatin A                                                                                            |
| CSTB          | x | A_52_P7400   | cystatin B                                                                                            |
| Ctla2a/Ctla2b | x | A_51_P180747 | cytotoxic T lymphocyte-associated protein 2 alpha                                                     |
| CTSA          | x | A_52_P672803 | cathepsin A                                                                                           |
| CTSB          | x | A_51_P465148 | cathepsin B                                                                                           |
| CTSC          | x | A_52_P195839 | cathepsin C                                                                                           |
| CTSS          | x | A_51_P423981 | cathepsin S                                                                                           |
| CTSZ          | x | A_51_P256202 | cathepsin Z                                                                                           |
| CX3CR1        | x | A_51_P350853 | similar to chemokine receptor CX3CR1; chemokine (C-X3-C) receptor 1                                   |
| CXCL13        | x | A_51_P378789 | chemokine (C-X-C motif) ligand 13                                                                     |
| CXCL16        | x | A_51_P374203 | chemokine (C-X-C motif) ligand 16                                                                     |
| CYTH4         | x | A_52_P271099 | cytohesin 4                                                                                           |
| DENND4C       |   | A_51_P192998 | DENN/MADD domain containing 4C                                                                        |

|                   |   |              |                                                                                                         |
|-------------------|---|--------------|---------------------------------------------------------------------------------------------------------|
| DHX58             | x | A_52_P223809 | DEXH (Asp-Glu-X-His) box polypeptide 58                                                                 |
| DOK1              | x | A_51_P275976 | docking protein 1                                                                                       |
| E2F1              |   | A_52_P587611 | E2F transcription factor 1                                                                              |
| EBI3              | x | A_51_P202633 | Epstein-Barr virus induced gene 3                                                                       |
| EIF2AK2           |   | A_52_P559919 | eukaryotic translation initiation factor 2-alpha kinase 2                                               |
| EMP3              | x | A_51_P446510 | epithelial membrane protein 3                                                                           |
| ENPP1             |   | A_51_P231499 | ectonucleotide pyrophosphatase/phosphodiesterase 1                                                      |
| EPST11            |   | A_51_P376050 | epithelial stromal interaction 1 (breast)                                                               |
| FABP4             |   | A_51_P336830 | fatty acid binding protein 4, adipocyte                                                                 |
| FAM167B           |   | A_52_P326657 | family with sequence similarity 167, member B                                                           |
| FCER1G            | x | A_51_P405478 | Fc receptor, IgE, high affinity I, gamma polypeptide                                                    |
| FCGR1A            | x | A_52_P47846  | Fc receptor, IgG, high affinity I                                                                       |
| FCGR2A            | x | A_52_P408757 | Fc receptor, IgG, low affinity III                                                                      |
| Fcrls             | x | A_51_P172168 | Fc receptor-like 5, scavenger receptor                                                                  |
| FES               | x | A_52_P365011 | feline sarcoma oncogene                                                                                 |
| FLI1              | x | A_52_P821    | Friend leukemia integration 1                                                                           |
| FLT1              | x | A_52_P307922 | FMS-like tyrosine kinase 1                                                                              |
| GALNT12           |   | A_51_P188911 | UDP-N-acetyl-alpha-D-galactosamine:polypeptide N-acetylgalactosaminyltransferase 12                     |
| GALNT6            | x | A_52_P111715 | UDP-N-acetyl-alpha-D-galactosamine:polypeptide N-acetylgalactosaminyltransferase 6                      |
| GCNT1             |   | A_52_P21550  | glucosaminyl (N-acetyl) transferase 1, core 2; similar to glucosaminyl (N-acetyl) transferase 1, core 2 |
| GMFG              | x | A_51_P156868 | glia maturation factor, gamma                                                                           |
| GPNMB             | x | A_51_P438967 | glycoprotein (transmembrane) nmb                                                                        |
| GPR183            | x | A_51_P358683 | G protein-coupled receptor 183                                                                          |
| GPR65             | x | A_51_P108459 | G-protein coupled receptor 65                                                                           |
| GPR84             | x | A_51_P276993 | G protein-coupled receptor 84                                                                           |
| GPSM3             | x | A_51_P106322 | G-protein signalling modulator 3 (AGS3-like, C. elegans)                                                |
| GSDMD             |   | A_51_P172231 | gasdermin D                                                                                             |
| GUSB              | x | A_51_P211491 | glucuronidase, beta                                                                                     |
| HAVCR2            | x | A_51_P109508 | hepatitis A virus cellular receptor 2                                                                   |
| HCK               | x | A_51_P499918 | hemopoietic cell kinase                                                                                 |
| HCST              |   | A_52_P170188 | hematopoietic cell signal transducer                                                                    |
| HELZ2             |   | A_52_P321358 | cDNA sequence BC006779                                                                                  |
| HLA-A             | x | A_51_P190499 | histocompatibility 2, K1, K region; similar to H-2K(d) antigen                                          |
| HLA-DMB           | x | A_51_P278868 | histocompatibility 2, class II, locus Mb1                                                               |
| HLA-G             |   | A_51_P469968 | histocompatibility 2, M region locus 3                                                                  |
| HPGDS             | x | A_52_P536796 | prostaglandin D2 synthase 2, hematopoietic                                                              |
| HVCN1             | x | A_51_P331831 | hydrogen voltage-gated channel 1                                                                        |
| ICAM1             | x | A_51_P408506 | intercellular adhesion molecule 1                                                                       |
| IFI16             |   | A_51_P408346 | interferon activated gene 204                                                                           |
| IFI203            |   | A_51_P237856 | similar to Interferon-activatable protein 203 (Ifi-203) (Interferon-inducible protein p203)             |
| Ifi2712a/Ifi2712b | x | A_51_P358233 | interferon, alpha-inducible protein 27 like 2A                                                          |
| IFI35             | x | A_51_P414889 | interferon-induced protein 35                                                                           |
| Ifi47             | x | A_51_P129229 | interferon gamma inducible protein 47                                                                   |
| IFIH1             | x | A_51_P387810 | interferon induced with helicase C domain 1                                                             |
| IFIT1B            | x | A_51_P327751 | interferon-induced protein with tetratricopeptide repeats 1                                             |
| IFIT3             | x | A_51_P359570 | interferon-induced protein with tetratricopeptide repeats 3                                             |
| IFITM3            | x | A_51_P128876 | interferon induced transmembrane protein 3                                                              |
| Ifitm6            |   | A_51_P294555 | interferon induced transmembrane protein 6                                                              |
| Igtp              | x | A_51_P112355 | interferon gamma induced GTPase                                                                         |
| Iigp1             | x | A_51_P387239 | interferon inducible GTPase 1; interferon-inducible GTPase-like                                         |
| IL13RA1           | x | A_51_P365189 | interleukin 13 receptor, alpha 1                                                                        |
| INPP5D            | x | A_51_P337125 | inositol polyphosphate-5-phosphatase D                                                                  |
| IQGAP3            |   | A_52_P588881 | IQ motif containing GTPase activating protein 3                                                         |
| IRF5              | x | A_51_P346668 | interferon regulatory factor 5                                                                          |
| IRF7              | x | A_51_P421876 | interferon regulatory factor 7                                                                          |
| IRF8              | x | A_52_P354823 | interferon regulatory factor 8                                                                          |
| IRF9              | x | A_51_P127367 | interferon regulatory factor 9                                                                          |
| IRGM              | x | A_51_P416295 | immunity-related GTPase family M member 2                                                               |
| Irgm1             | x | A_52_P126158 | immunity-related GTPase family M member 1                                                               |

|                         |   |              |                                                                                                            |
|-------------------------|---|--------------|------------------------------------------------------------------------------------------------------------|
| ISG15                   |   | A_52_P463936 | ISG15 ubiquitin-like modifier; predicted gene 9706                                                         |
| ISG20                   |   | A_51_P510713 | interferon-stimulated protein                                                                              |
| ITGAX                   | x | A_51_P303424 | integrin alpha X                                                                                           |
| ITGB2                   | x | A_51_P262208 | integrin beta 2                                                                                            |
| ITPRIPL2                | x | A_51_P263407 | inositol 1,4,5-triphosphate receptor interacting protein-like 1                                            |
| KCNK6                   | x | A_51_P315890 | potassium inwardly-rectifying channel, subfamily K, member 6                                               |
| LAIR1                   | x | A_51_P503797 | leukocyte-associated Ig-like receptor 1                                                                    |
| LAPTM5                  | x | A_52_P13815  | lysosomal-associated protein transmembrane 5                                                               |
| LAT2                    | x | A_51_P242930 | linker for activation of T cells family, member 2                                                          |
| LCP1                    | x | A_52_P56751  | lymphocyte cytosolic protein 1                                                                             |
| LCP2                    | x | A_51_P352875 | lymphocyte cytosolic protein 2                                                                             |
| LGALS1                  | x | A_51_P465281 | lectin, galactose binding, soluble 1                                                                       |
| LGALS3BP                | x | A_51_P359636 | lectin, galactoside-binding, soluble, 3 binding protein                                                    |
| LGALS9B                 | x | A_51_P500813 | lectin, galactose binding, soluble 9                                                                       |
| LITAF                   | x | A_51_P267239 | LPS-induced TN factor                                                                                      |
| LPXN                    | x | A_52_P577748 | leupaxin                                                                                                   |
| LRMP                    |   | A_51_P130079 |                                                                                                            |
| LRP1                    |   | A_52_P202045 | low density lipoprotein receptor-related protein 1                                                         |
| Lst1                    | x | A_51_P205008 | leukocyte specific transcript 1                                                                            |
| LY86                    | x | A_51_P465350 | lymphocyte antigen 86                                                                                      |
| LY96                    |   | A_51_P476601 | lymphocyte antigen 96                                                                                      |
| LYN                     | x | A_51_P345422 | Yamaguchi sarcoma viral (v-yes-1) oncogene homolog                                                         |
| LYZ                     | x | A_52_P238027 | lysozyme 2                                                                                                 |
| MAFB                    |   | A_52_P495869 | v-maf musculoaponeurotic fibrosarcoma oncogene family, protein B (avian)                                   |
| MAN2B1                  | x | A_51_P336161 | mannosidase 2, alpha B1                                                                                    |
| MAPKAPK2                |   | A_51_P118902 | MAP kinase-activated protein kinase 2                                                                      |
| MPEG1                   | x | A_51_P390538 | macrophage expressed gene 1                                                                                |
| MS4A6A                  | x | A_51_P149714 | membrane-spanning 4-domains, subfamily A, member 6D                                                        |
| Ms4a6b                  | x | A_51_P422300 | membrane-spanning 4-domains, subfamily A, member 6B                                                        |
| MS4A7                   | x | A_51_P277216 | membrane-spanning 4-domains, subfamily A, member 7                                                         |
| MSR1                    |   | A_51_P404846 | macrophage scavenger receptor 1                                                                            |
| MYO1F                   | x | A_52_P113190 | myosin IF                                                                                                  |
| MYO1G                   |   | A_51_P333253 | myosin IG                                                                                                  |
| MYOF                    |   | A_51_P478353 | myoferlin                                                                                                  |
| NAIP                    | x | A_51_P265026 | NLR family, apoptosis inhibitory protein 1, related sequence 1; NLR family, apoptosis inhibitory protein 2 |
| Naip1 (includes others) | x | A_52_P300786 | NLR family, apoptosis inhibitory protein 5                                                                 |
| NCF2                    | x | A_51_P402909 | neutrophil cytosolic factor 2; neutrophil cytosolic factor 2 related sequence                              |
| NCF4                    | x | A_51_P377452 | neutrophil cytosolic factor 4                                                                              |
| NCKAP1L                 | x | A_51_P119429 | NCK associated protein 1 like                                                                              |
| NFKBID                  |   | A_51_P322954 | nuclear factor of kappa light polypeptide gene enhancer in B-cells inhibitor, delta                        |
| NQO2                    |   | A_51_P229536 | NAD(P)H dehydrogenase, quinone 2                                                                           |
| Oas1d (includes others) | x | A_51_P428529 | 2'-5' oligoadenylate synthetase 1C                                                                         |
| Oas12                   | x | A_51_P387123 | 2'-5' oligoadenylate synthetase-like 2                                                                     |
| OLFML3                  | x | A_51_P191782 | olfactomedin-like 3                                                                                        |
| P2RX7                   | x | A_52_P393314 | purinergic receptor P2X, ligand-gated ion channel, 7                                                       |
| P2RY6                   | x | A_51_P105124 | pyrimidinergic receptor P2Y, G-protein coupled, 6                                                          |
| PARP14                  | x | A_51_P514712 | poly (ADP-ribose) polymerase family, member 14                                                             |
| PARP9                   | x | A_51_P218984 | poly (ADP-ribose) polymerase family, member 9                                                              |
| PARVG                   |   | A_52_P531651 | parvin, gamma                                                                                              |
| PDE1C                   |   | A_52_P208222 | phosphodiesterase 1C                                                                                       |
| PF4                     |   | A_51_P441426 | platelet factor 4                                                                                          |
| Pgap2                   |   | A_51_P226740 | post-GPI attachment to proteins 2                                                                          |
| PIK3CD                  |   | A_52_P99848  | phosphatidylinositol 3-kinase catalytic delta polypeptide; RIKEN cDNA 2610208K16 gene                      |
| PLAUR                   |   | A_51_P112405 | plasminogen activator, urokinase receptor                                                                  |
| PLCG2                   |   | A_51_P279163 | phospholipase C, gamma 2                                                                                   |
| PLD4                    | x | A_52_P591153 | phospholipase D family, member 4                                                                           |

|           |   |              |                                                                                            |
|-----------|---|--------------|--------------------------------------------------------------------------------------------|
| PLEKHO2   |   | A_51_P293982 | pleckstrin homology domain containing, family O member 2                                   |
| PLIN2     |   | A_51_P258150 | adipose differentiation related protein                                                    |
| PON3      | x | A_52_P662226 | paraoxonase 3                                                                              |
| PPFIBP2   |   | A_51_P230439 | protein tyrosine phosphatase, receptor-type, F interacting protein, binding protein 2      |
| PSMA8     |   | A_51_P213666 | proteasome (prosome, macropain) subunit, alpha type, 8                                     |
| PSMB8     | x | A_51_P345366 | proteasome (prosome, macropain) subunit, beta type 8 (large multifunctional peptidase 7)   |
| PSMB9     | x | A_51_P369803 | proteasome (prosome, macropain) subunit, beta type 9 (large multifunctional peptidase 2)   |
| PTGES     |   | A_51_P312327 | prostaglandin E synthase                                                                   |
| PTPN18    | x | A_51_P236118 | protein tyrosine phosphatase, non-receptor type 18                                         |
| PTPN6     | x | A_52_P114722 | protein tyrosine phosphatase, non-receptor type 6                                          |
| PTPRC     | x | A_52_P677117 | protein tyrosine phosphatase, receptor type, C                                             |
| PYCARD    | x | A_51_P438820 | PYD and CARD domain containing                                                             |
| RAB32     | x | A_51_P293688 | RAB32, member RAS oncogene family                                                          |
| RAC2      |   | A_51_P121891 | RAS-related C3 botulinum substrate 2                                                       |
| RASGRP3   |   | A_52_P198435 | RAS, guanyl releasing protein 3                                                            |
| RASSF4    |   | A_52_P650307 | Ras association (RalGDS/AF-6) domain family member 4                                       |
| RCSL1     |   | A_51_P371091 | RCSL domain containing 1                                                                   |
| RENBP     | x | A_51_P123765 | renin binding protein                                                                      |
| RGS10     | x | A_51_P218774 | regulator of G-protein signalling 10                                                       |
| RHOH      |   | A_51_P489289 | ras homolog gene family, member H                                                          |
| RSAD2     | x | A_52_P670026 | radical S-adenosyl methionine domain containing 2                                          |
| RTP4      | x | A_51_P304170 | receptor transporter protein 4                                                             |
| S100A4    | x | A_51_P105078 | hippocampus abundant transcript-like 1; S100 calcium binding protein A4                    |
| SAMSN1    | x | A_52_P646832 | SAM domain, SH3 domain and nuclear localization signals, 1                                 |
| SASH3     | x | A_51_P447866 | SAM and SH3 domain containing 3                                                            |
| SEPP1     |   | A_51_P470328 | selenoprotein P, plasma, 1                                                                 |
| SKAP2     | x | A_51_P243914 | src family associated phosphoprotein 2                                                     |
| SLAMF9    | x | A_51_P246066 | SLAM family member 9                                                                       |
| SLC11A1   | x | A_51_P186476 | solute carrier family 11 (proton-coupled divalent metal ion transporters), member 1        |
| SLC11A2   |   | A_51_P388737 | solute carrier family 11 (proton-coupled divalent metal ion transporters), member 2        |
| SLC15A3   | x | A_52_P467389 | solute carrier family 15, member 3                                                         |
| SLC25A18  | x | A_51_P507664 | solute carrier family 25 (mitochondrial carrier, phosphate carrier), member 24             |
| SLC37A2   |   | A_51_P259774 | solute carrier family 37 (glycerol-3-phosphate transporter), member 2                      |
| SLC7A7    | x | A_51_P472249 | solute carrier family 7 (cationic amino acid transporter, y+ system), member 7             |
| Slnf2     | x | A_51_P423578 | schlafen 2                                                                                 |
| SLFN5     |   | A_51_P364694 | schlafen 5; hypothetical protein LOC100047131                                              |
| SOAT1     | x | A_52_P651833 | sterol O-acyltransferase 1                                                                 |
| SP110     |   | A_52_P512201 | predicted gene 15753; Sp110 nuclear body protein                                           |
| SPP1      | x | A_51_P358765 | secreted phosphoprotein 1                                                                  |
| Srgn      | x | A_51_P193019 | serglycin                                                                                  |
| STAT1     | x | A_52_P70255  | signal transducer and activator of transcription 1                                         |
| TBXAS1    | x | A_51_P448664 | thromboxane A synthase 1, platelet                                                         |
| TGFB1     | x | A_51_P390715 | transforming growth factor, beta 1                                                         |
| TGFBR2    | x | A_51_P450573 | transforming growth factor, beta receptor II                                               |
| TIFA      | x | A_51_P249989 | TRAF-interacting protein with forkhead-associated domain; similar to Traf2 binding protein |
| TLN1      | x | A_51_P446865 | talin 1                                                                                    |
| TLR1      | x | A_51_P495581 | toll-like receptor 1                                                                       |
| TLR2      | x | A_51_P452629 | toll-like receptor 2                                                                       |
| TLR7      | x | A_51_P371710 | toll-like receptor 7                                                                       |
| TMEM140   |   | A_52_P463977 | transmembrane protein 140                                                                  |
| TMEM173   | x | A_51_P240801 | transmembrane protein 173                                                                  |
| TMEM37    |   | A_51_P401987 | transmembrane protein 37                                                                   |
| TNFAIP8L2 | x | A_51_P150678 | tumor necrosis factor, alpha-induced protein 8-like 2                                      |
| TNFRSF1A  | x | A_52_P192426 | tumor necrosis factor receptor superfamily, member 1b                                      |



|                 |   |              |                                                                               |
|-----------------|---|--------------|-------------------------------------------------------------------------------|
| TNNI2           | x | A_51_P355122 | troponin I, skeletal, fast 2                                                  |
| TNXB            |   | A_51_P505530 | tenascin XB                                                                   |
| TOR3A           | x | A_51_P198179 | torsin family 3, member A                                                     |
| TREM2           | x | A_51_P269546 | triggering receptor expressed on myeloid cells 2                              |
| TRIM25          | x | A_51_P212854 | tripartite motif-containing 25                                                |
| Trim30a/Trim30d | x | A_51_P275454 | tripartite motif-containing 30                                                |
| TSPO            | x | A_51_P222657 | translocator protein                                                          |
| TUBA1C          |   | A_52_P479099 | tubulin, alpha 1C; predicted gene 6682                                        |
| TYROBP          | x | A_51_P261517 | TYRO protein tyrosine kinase binding protein                                  |
| UBA7            |   | A_51_P316816 | ubiquitin-activating enzyme E1-like; RIKEN cDNA D330022A01 gene               |
| UCP2            | x | A_51_P297105 | uncoupling protein 2 (mitochondrial, proton carrier)                          |
| UGT1A6          | x | A_51_P308362 | similar to UDP glycosyltransferase 1 family polypeptide A13                   |
| USP18           | x | A_51_P164219 | ubiquitin specific peptidase 18; similar to ubiquitin specific protease UBP43 |
| VAMP8           | x | A_52_P279152 | vesicle-associated membrane protein 8                                         |
| Wfdc17          |   | A_52_P700056 | predicted gene 11428                                                          |
| Xlr4a           |   | A_51_P457244 | X-linked lymphocyte-regulated 4D                                              |
| ZC3HAV1         |   | A_51_P177744 | zinc finger CCCH type, antiviral 1                                            |
| ZNF169          |   | A_52_P196743 | zinc finger protein 169                                                       |

### Neuron list

| Symbol   | Hwang DEG | ProbeName    | Gene Name                                                                                      |
|----------|-----------|--------------|------------------------------------------------------------------------------------------------|
| ABCA9    | x         | A_52_P51503  | ATP-binding cassette, sub-family A (ABC1), member 9(Abca9)                                     |
| ABLIM1   |           | A_52_P489778 | actin-binding LIM protein 1                                                                    |
| ACVR2A   |           | A_52_P664656 | activin receptor IIA(Acvr2a)                                                                   |
| ADAMTS15 |           | A_51_P311038 | a disintegrin-like and metallopeptidase (reprolysin type) with thrombospondin type 1 motif, 15 |
| ADCY1    |           | A_51_P196718 | adenylate cyclase 1(Adcy1)                                                                     |
| ADD2     |           | A_52_P260570 | adducin 2 (beta)(Add2)                                                                         |
| AGTPBP1  |           | A_51_P519369 | ATP/GTP binding protein 1                                                                      |
| Akap9    |           | A_52_P567697 | A kinase (PRKA) anchor protein (yotiao) 9                                                      |
| ALDH1A3  |           | A_52_P87843  | aldehyde dehydrogenase family 1, subfamily A3(Aldh1a3)                                         |
| Aldh1a7  |           | A_51_P383399 | aldehyde dehydrogenase family 1, subfamily A7(Aldh1a7)                                         |
| AMPH     |           | A_51_P460739 | amphiphysin(Amph)                                                                              |
| Ank2     |           | A_51_P319562 | ankyrin 2, brain(Ank2)                                                                         |
| ANKRD12  |           | A_51_P322759 | ankyrin repeat domain 12; similar to Ankrd12 protein                                           |
| APBA1    |           | A_52_P429944 | amyloid beta (A4) precursor protein binding, family A, member 1(Apba1)                         |
| ARHGAP26 |           | A_52_P187820 | Rho GTPase activating protein 26(Arhgap26)                                                     |
| ARPP21   |           | A_52_P582732 | cyclic AMP-regulated phosphoprotein, 21                                                        |
| ATP8A1   |           | A_52_P385896 | ATPase, aminophospholipid transporter (APLT), class I, type 8A, member 1                       |
| ATRNL1   |           | A_52_P584293 | attractin like 1                                                                               |
| B3GALT2  |           | A_52_P671399 | UDP-Gal:betaGlcNAc beta 1,3-galactosyltransferase, polypeptide 2(B3galt2)                      |
| BDNF     |           | A_52_P384100 | brain derived neurotrophic factor                                                              |
| BEAN1    |           | A_51_P111962 | brain expressed, associated with Nedd4                                                         |
| BEND6    |           | A_51_P280666 | BEN domain containing 6                                                                        |
| C8orf34  |           | A_51_P172952 | chromosome 8 open reading frame 34                                                             |
| Cabp1    |           | A_51_P386142 | calcium binding protein 1                                                                      |
| CACNA1H  |           | A_52_P588378 | calcium channel, voltage-dependent, T type, alpha 1H subunit(Cacna1h)                          |
| CACNA2D1 |           | A_52_P160543 | calcium channel, voltage-dependent, alpha 2/delta subunit 2(Cacna2d2)                          |
| CACNA2D2 |           | A_51_P171711 | calcium channel, voltage-dependent, alpha2/delta subunit 1(Cacna2d1)                           |
| Cadm2    |           | A_51_P442642 | cell adhesion molecule 2                                                                       |
| CADPS    |           | A_52_P121903 | Ca2+-dependent secretion activator                                                             |
| CADPS2   |           | A_51_P233153 | Ca2+-dependent activator protein for secretion 2                                               |
| CALB2    |           | A_51_P311436 | calbindin 2(Calb2)                                                                             |
| CALM1    |           | A_51_P185971 | calmodulin 1(Calm1)                                                                            |
| CALN1    |           | A_51_P199407 | calneuron 1                                                                                    |
| CAMK4    |           | A_52_P672960 | calcium/calmodulin-dependent protein kinase IV                                                 |
| CAMTA1   |           | A_52_P617512 | calmodulin binding transcription activator 1                                                   |

|         |               |                                                                                                  |
|---------|---------------|--------------------------------------------------------------------------------------------------|
| CASKIN1 | A_51_P341926  | CASK interacting protein 1                                                                       |
| CBLN2   | A_52_P233703  | cerebellin 2 precursor protein                                                                   |
| CCK     | A_52_P539124  | cholecystokinin(Cck)                                                                             |
| CCSER1  | A_52_P618671  | coiled-coil serine-rich protein 1                                                                |
| CDH10   | A_51_P401761  | cadherin 10(Cdh10)                                                                               |
| CDH8    | A_52_P653678  | cadherin 8(Cdh8)                                                                                 |
| CELF2   | A_52_P499551  | CUG triplet repeat, RNA binding protein 2                                                        |
| CHD5    | A_52_P18299   | chromodomain helicase DNA binding protein 5(Chd5)                                                |
| CHRM3   | A_52_P92072   | cholinergic receptor, muscarinic 3, cardiac(Chrm3)                                               |
| CISH    | A_51_P470715  | cytokine inducible SH2-containing protein                                                        |
| CLASP2  | A_52_P373504  | CLIP associating protein 2                                                                       |
| CLSTN2  | A_51_P370423  | calsyntenin 2(Clstn2)                                                                            |
| CLV51   | A_51_P333859  | retinaldehyde binding protein 1                                                                  |
| CNRIP1  | A_51_P131687  | cannabinoid receptor interacting protein 1                                                       |
| CNTN2   | A_52_P365732  | contactin 2                                                                                      |
| COX6A2  | A_51_P509997  | cytochrome c oxidase, subunit VI a, polypeptide 2                                                |
| CPLX2   | A_52_P650908  | complexin 3                                                                                      |
| CPNE4   | A_52_P392314  | copine IV                                                                                        |
| CSRNP3  | A_52_P326531  | cysteine-serine-rich nuclear protein 3(Csrnp3)                                                   |
| CSRP2   | A_51_P300337  | cysteine and glycine-rich protein 2                                                              |
| CTNND2  | A_52_P587441  | catenin (cadherin associated protein), delta 2                                                   |
| CTTNBP2 | A_52_P284243  | cortactin binding protein 2                                                                      |
| DACT1   | A_51_P175567  | dishevelled-binding antagonist of beta-catenin 1(Dact1)                                          |
| DCLK3   | A_52_P442414  | doublecortin-like kinase 3                                                                       |
| DCX     | A_52_P244349  | doublecortin                                                                                     |
| DLEU7   | A_52_P478394  | deleted in lymphocytic leukemia, 7                                                               |
| DLG2    | A_52_P1131821 | discs, large homolog 2 (Drosophila)(Dlg2)                                                        |
| DLGAP1  | A_52_P445843  | discs, large (Drosophila) homolog-associated protein 1(Dlgap1)                                   |
| DMXL2   | A_51_P141660  | Dmx-like 2(Dmxl2)                                                                                |
| DNAJB12 | A_52_P92302   | Dnaj (Hsp40) homolog, subfamily B, member 12                                                     |
| DNAJB5  | A_52_P304264  | Dnaj heat shock protein family (Hsp40) member B5(Dnajb5)                                         |
| DOCK3   | A_52_P739775  | dedicator of cyto-kinesis 3                                                                      |
| DOK5    | A_51_P380709  | docking protein 5(Dok5)                                                                          |
| EDIL3   | A_52_P325527  | EGF-like repeats and discoidin I-like domains 3                                                  |
| EEF1A2  | A_51_P485862  | eukaryotic translation elongation factor 1 alpha 2(Eef1a2)                                       |
| ELMOD1  | A_51_P118061  | ELMO domain containing 1                                                                         |
| EPHA3   | A_52_P276955  | Eph receptor A3(Epha3)                                                                           |
| EPHA4   | A_52_P288177  | Eph receptor A4                                                                                  |
| EPHA5   | A_52_P100484  | Eph receptor A5                                                                                  |
| EPHA7   | A_52_P504787  | Eph receptor A7                                                                                  |
| ERC2    | A_51_P209903  | ELKS/RAB6-interacting/CAST family member 2                                                       |
| FAM110D | A_51_P128463  | glycine/arginine rich protein 1                                                                  |
| FAM169A | A_52_P488623  | family with sequence similarity 169, member A                                                    |
| FAT4    | A_51_P353056  | FAT tumor suppressor homolog 4 (Drosophila)                                                      |
| FGF12   | A_52_P193161  | fibroblast growth factor 12                                                                      |
| FGF13   | A_51_P409220  | fibroblast growth factor 13                                                                      |
| FGF19   | A_51_P440985  | fibroblast growth factor 19                                                                      |
| FGF9    | A_51_P497152  | fibroblast growth factor 9                                                                       |
| FOXO6   | A_52_P589568  | forkhead box O6                                                                                  |
| FSTL5   | A_51_P296015  | follistatin-like 5                                                                               |
| FUT9    | A_51_P417758  | fucosyltransferase 8                                                                             |
| FZD9    | A_51_P511015  | frizzled homolog 9 (Drosophila)                                                                  |
| GABRA1  | A_52_P259184  | gamma-aminobutyric acid (GABA) A receptor, subunit alpha 1(Gabra1)                               |
| GABRA2  | A_51_P417507  | gamma-aminobutyric acid (GABA) A receptor, subunit alpha 2(Gabra2)                               |
| GABRA5  | A_52_P143037  | gamma-aminobutyric acid (GABA) A receptor, subunit alpha 5                                       |
| GABRB2  | A_51_P227679  | gamma-aminobutyric acid (GABA) A receptor, subunit beta 2                                        |
| GABRG2  | A_52_P444611  | gamma-aminobutyric acid (GABA) A receptor, subunit gamma 2(Gabrg2)                               |
| GALNTL6 | A_52_P385718  | UDP-N-acetyl-alpha-D-galactosamine:polypeptide N-acetylgalactosaminyltransferase-like 6(Galntl6) |
| GAP43   | A_51_P290065  | growth associated protein 43(Gap43)                                                              |
| GARNL3  | A_52_P537376  | GTPase activating RANGAP domain-like 3(Garnl3)                                                   |
| GDA     | A_51_P291950  | guanine deaminase                                                                                |
| GJD2    | A_52_P538310  | gap junction protein, delta 2(Gjd2)                                                              |

|           |   |               |                                                                                    |
|-----------|---|---------------|------------------------------------------------------------------------------------|
| GNAL      |   | A_52_P227481  | guanine nucleotide binding protein, alpha stimulating, olfactory type(Gnal)        |
| GNAZ      |   | A_52_P307761  | guanine nucleotide binding protein, alpha z subunit                                |
| GNG7      |   | A_51_P443686  | guanine nucleotide binding protein (G protein), gamma 7(Gng7)                      |
| GPC5      |   | A_52_P310398  | glypican 5(Gpc5)                                                                   |
| GPR12     |   | A_51_P104722  | G-protein coupled receptor 12                                                      |
| GPR88     |   | A_51_P201873  | G-protein coupled receptor 88(Gpr88)                                               |
| GRIA1     |   | A_51_P498031  | glutamate receptor, ionotropic, AMPA1 (alpha 1)(Gria1)                             |
| GRIA2     |   | A_52_P575176  | glutamate receptor, ionotropic, AMPA2 (alpha 2)                                    |
| GRIK1     |   | A_51_P282609  | glutamate receptor, ionotropic, kainate 1                                          |
| GRIN1     |   | A_52_P69292   | glutamate receptor, ionotropic, NMDA1 (zeta 1)(Grin1)                              |
| GRIN2B    |   | A_51_P229869  | glutamate receptor, ionotropic, NMDA2B (epsilon 2)                                 |
| GRM2      |   | A_51_P494725  | glutamate receptor, metabotropic 2(Grm2)                                           |
| GUCY1B3   |   | A_51_P253303  | guanylate cyclase 1, soluble, beta 3                                               |
| HAPLN1    |   | A_51_P101787  | hyaluronan and proteoglycan link protein 1                                         |
| HBA1      |   | A_52_P278538  | hemoglobin, alpha 1                                                                |
| HCN1      |   | A_52_P311313  | hyperpolarization-activated, cyclic nucleotide-gated K+ 1(Hcn1)                    |
| HDAC9     |   | A_52_P411780  | histone deacetylase 9                                                              |
| HDFGRP3   |   | A_52_P317230  | hepatoma-derived growth factor, related protein 3(Hdgfrp3)                         |
| HECTD2    |   | A_52_P596458  | HECT domain containing 2(Hectd2)                                                   |
| HECTD4    |   | A_51_P159902  | HECT domain containing E3 ubiquitin protein ligase 4                               |
| HECW1     |   | A_52_P454172  | HECT, C2 and WW domain containing E3 ubiquitin protein ligase 1(Hecw1)             |
| HOMER1    |   | A_52_P151211  | homer homolog 1 (Drosophila)                                                       |
| HOMER2    |   | A_51_P352303  | homer homolog 2 (Drosophila)                                                       |
| HPCA      |   | A_52_P287246  | hippocalcin                                                                        |
| HPCAL4    |   | A_51_P388819  | hippocalcin-like 4                                                                 |
| HS6ST2    |   | A_52_P599317  | heparan sulfate 6-O-sulfotransferase 2                                             |
| HSPB3     |   | A_51_P419007  | heat shock protein 3                                                               |
| IGSF3     |   | A_51_P327632  | immunoglobulin superfamily, member 3(Igsf3)                                        |
| INHBA     |   | A_51_P239750  | inhibin beta-A(Inhba)                                                              |
| JAKMIP2   |   | A_52_P1188177 | janus kinase and microtubule interacting protein 2                                 |
| KALRN     |   | A_51_P215828  | kalirin, RhoGEF kinase                                                             |
| KCNC1     |   | A_52_P592305  | potassium voltage gated channel, Shaw-related subfamily, member 1                  |
| KCNC2     |   | A_51_P507333  | potassium voltage gated channel, Shaw-related subfamily, member 2                  |
| KCNMA1    |   | A_51_P187352  | potassium large conductance calcium-activated channel, subfamily M, alpha member 1 |
| KIAA0895L |   | A_51_P105241  | KIAA0895-like                                                                      |
| KIAA1549L |   | A_51_P519040  | KIAA1549-like                                                                      |
| KIAA1841  |   | A_52_P434639  | RIKEN cDNA 0610010F05 gene                                                         |
| KIF21B    |   | A_52_P282500  | kinesin family member 21B                                                          |
| KIF2A     |   | A_52_P582519  | kinesin family member 2A                                                           |
| KIF5C     | x | A_52_P125429  | kinesin family member 5C(Kif5c)                                                    |
| KIFAP3    |   | A_52_P363301  | kinesin-associated protein 3(Kifap3)                                               |
| KIT       |   | A_51_P355906  | kit oncogene                                                                       |
| LANCL2    |   | A_52_P474665  | LanC (bacterial lantibiotic synthetase component C)-like 2(Lancl2)                 |
| LIN7A     |   | A_52_P48762   | lin-7 homolog A (C. elegans)(Lin7a)                                                |
| LRP8      |   | A_51_P445765  | low density lipoprotein receptor-related protein 8, apolipoprotein e receptor      |
| LRRC17    |   | A_51_P301930  | leucine rich repeat containing 17(Lrrc17)                                          |
| LRRC3B    |   | A_51_P362089  | leucine rich repeat containing 3B                                                  |
| MACROD2   |   | A_51_P289464  | predicted gene 2348; MACRO domain containing 2                                     |
| MAP1B     |   | A_51_P205139  | microtubule-associated protein 1B(Map1b)                                           |
| MAP2      |   | A_51_P180754  | microtubule-associated protein 2(Map2)                                             |
| MAP2K6    |   | A_52_P395242  | mitogen-activated protein kinase kinase 6                                          |
| MAP3K10   |   | A_51_P377667  | mitogen-activated protein kinase kinase kinase 10(Map3k10)                         |
| MAP3K9    |   | A_52_P980158  | mitogen-activated protein kinase kinase kinase 9(Map3k9)                           |
| MAP9      |   | A_51_P250017  | microtubule-associated protein 9                                                   |
| MAPK8     |   | A_52_P558382  | mitogen-activated protein kinase 8                                                 |
| MARK1     |   | A_51_P295757  | MAP/microtubule affinity-regulating kinase 1                                       |
| MEF2C     |   | A_51_P135802  | myocyte enhancer factor 2C(Mef2c)                                                  |
| Meg3      |   | A_52_P196568  | maternally expressed 3                                                             |
| MET       | x | A_52_P656418  | met proto-oncogene(Met)                                                            |

|          |              |                                                                                     |
|----------|--------------|-------------------------------------------------------------------------------------|
| MGST3    | A_51_P336850 | microsomal glutathione S-transferase 3                                              |
| Mlip     | A_51_P427828 | muscular LMNA-interacting protein                                                   |
| MMD      | A_51_P431470 | monocyte to macrophage differentiation-associated(Mmd)                              |
| MYCN     | A_52_P536494 | v-myc myelocytomatosis viral related oncogene, neuroblastoma derived (avian)        |
| MYO1B    | A_52_P289325 | myosin IB                                                                           |
| MYT1L    | A_52_P499453 | myelin transcription factor 1-like(Myt1l)                                           |
| NCAM1    | A_52_P37077  | neural cell adhesion molecule 1                                                     |
| NEDD4L   | A_52_P544878 | neural precursor cell expressed, developmentally down-regulated gene 4-like         |
| NEFL     | A_51_P168646 | neurofilament, light polypeptide(Nefl)                                              |
| Nefm     | A_51_P145220 | neurofilament, medium polypeptide                                                   |
| NEGR1    | A_52_P191412 | neuronal growth regulator 1                                                         |
| NETO1    | A_51_P145948 | neuropilin (NRP) and tolloid (TLL)-like 1(Neto1)                                    |
| NEUROD2  | A_52_P624475 | neurogenic differentiation 2                                                        |
| NLGN1    | A_52_P497105 | neuroligin 1(Nlgn1)                                                                 |
| NOL4     | A_52_P167317 | nucleolar protein 4                                                                 |
| Nos1ap   | A_52_P491616 | nitric oxide synthase 1 (neuronal) adaptor protein(Nos1ap)                          |
| NPAS4    | A_51_P433810 | neuronal PAS domain protein 4                                                       |
| NR4A1    | A_51_P239654 | nuclear receptor subfamily 4, group A, member 1                                     |
| NREP     | A_52_P301821 | neuronal regeneration related protein(Nrep)                                         |
| NRIP1    | A_51_P152747 | nuclear receptor interacting protein 1                                              |
| NRXN1    | A_52_P131476 | neurexin I(Nrxn1)                                                                   |
| Nrxn3    | A_52_P39644  | neurexin III                                                                        |
| NTS      | A_51_P485756 | neurotensin(Nts)                                                                    |
| PAK5     | A_52_P629112 | p21 protein (Cdc42/Rac)-activated kinase 3                                          |
| PAK7     | A_51_P107934 | p21 protein (Cdc42/Rac)-activated kinase 7                                          |
| PCLO     | A_52_P141641 | piccolo (presynaptic cytomatrix protein)(Pclo)                                      |
| PDE10A   | A_52_P972559 | phosphodiesterase 10A(Pde10a)                                                       |
| PDE2A    | A_51_P120024 | phosphodiesterase 2A, cGMP-stimulated(Pde2a)                                        |
| PGBD5    | A_51_P343818 |                                                                                     |
| PGM2L1   | A_52_P301079 | phosphoglucomutase 2-like 1                                                         |
| PIP4K2B  | A_51_P267375 | phosphatidylinositol-5-phosphate 4-kinase, type II, beta(Pip4k2b)                   |
| PLCB1    | A_52_P506930 | phospholipase C, beta 1                                                             |
| PLCXD2   | A_51_P110529 | plexin A2                                                                           |
| PLXNA2   | A_52_P431981 | plexin A2(Plxna2)                                                                   |
| PLXNA3   | A_52_P539632 | plexin A3(Plxna3)                                                                   |
| PPM1E    | A_51_P432024 | protein phosphatase 1E (PP2C domain containing)(Ppm1e)                              |
| PPP3CB   | A_52_P167125 | protein phosphatase 3, catalytic subunit, beta isoform(PPP3cb)                      |
| PRICKLE2 | A_52_P29987  | prickle-like 2 (Drosophila)                                                         |
| PRKCE    | A_52_P375455 | RIKEN cDNA 9630025F12 gene; protein kinase C, epsilon                               |
| PROK2    | A_52_P158476 | prokineticin 2(Prok2)                                                               |
| PROKR2   | A_51_P396719 | prokineticin receptor 2(Prokr2)                                                     |
| PTBP2    | A_52_P593110 | polypyrimidine tract binding protein 2(Ptbp2)                                       |
| PTH1H    | A_51_P129363 | parathyroid hormone-like peptide(Pthlh)                                             |
| PTPN5    | A_51_P116239 | protein tyrosine phosphatase, non-receptor type 5                                   |
| PURG     | A_52_P134317 | purine-rich element binding protein G                                               |
| PVRL3    | A_52_P15495  | poliovirus receptor-related 3                                                       |
| RAB3C    | A_51_P481978 | similar to RAB3C, member RAS oncogene family; RAB3C, member RAS oncogene family     |
| RAB6B    | A_51_P276418 | RAB6B, member RAS oncogene family                                                   |
| RAB9B    | A_52_P327993 | RAB9B, member RAS oncogene family                                                   |
| RABGAP1L | A_51_P286610 | RAB GTPase activating protein 1-like                                                |
| RAP1GAP2 | A_52_P39756  | GTPase activating RANGAP domain-like 4                                              |
| RAPGEF4  | A_52_P731018 | Rap guanine nucleotide exchange factor (GEF) 4(Rapgef4)                             |
| RBFOX2   | A_52_P310530 | RNA binding motif protein 9                                                         |
| RGS4     | A_52_P43326  | regulator of G-protein signaling4                                                   |
| ROBO1    | A_51_P174314 | roundabout homolog 1 (Drosophila)                                                   |
| RPRM     | A_52_P627967 | reprimin, TP53 dependent G2 arrest mediator candidate(Rprm)                         |
| RSPO2    | A_51_P222337 | R-spondin 2 homolog (Xenopus laevis)                                                |
| RUFY3    | A_52_P652328 | RUN and FYVE domain containing 3(Rufy3)                                             |
| RUNX1T1  | A_51_P126206 | runt-related transcription factor 1; translocated to, 1 (cyclin D-related)(Runx1t1) |

|          |               |                                                                                                                                       |
|----------|---------------|---------------------------------------------------------------------------------------------------------------------------------------|
| RXRG     | A_51_P513311  | retinoid X receptor gamma                                                                                                             |
| RYR2     | A_52_P440709  | ryanodine receptor 2, cardiac                                                                                                         |
| SATB1    | A_52_P110489  | special AT-rich sequence binding protein 1(Satb1)                                                                                     |
| SCN3B    | A_51_P184331  | sodium channel, voltage-gated, type III, beta                                                                                         |
| SEMA3A   | A_52_P527748  | sema domain, immunoglobulin domain (Ig), short basic domain, secreted, (semaphorin) 3A(Sema3a)                                        |
| SH3GL2   | A_52_P1060059 | SH3-domain GRB2-like 2(Sh3gl2)                                                                                                        |
| SLA      | A_52_P513177  | src-like adaptor                                                                                                                      |
| SLC17A6  | A_51_P174996  | solute carrier family 17 (sodium-dependent inorganic phosphate cotransporter), member 6(Slc17a6)                                      |
| SLC17A7  | A_51_P137913  | solute carrier family 17 (sodium-dependent inorganic phosphate cotransporter), member 7(Slc17a7)                                      |
| Slc6a15  | A_52_P220440  | solute carrier family 6 (neurotransmitter transporter), member 15                                                                     |
| SLC6A17  | A_52_P373637  | solute carrier family 6 (neurotransmitter transporter), member 17                                                                     |
| SLC7A3   | A_51_P275016  | solute carrier family 7 (cationic amino acid transporter, y+ system), member 3                                                        |
| SLC8A1   | A_51_P277373  | solute carrier family 8 (sodium/calcium exchanger), member 1                                                                          |
| SLF1     | A_51_P207411  | SMC5-SMC6 complex localization factor 1(Slf1)                                                                                         |
| SMARCA2  | A_51_P504037  | SWI/SNF related, matrix associated, actin dependent regulator of chromatin, subfamily a, member 2(Smarca2)                            |
| SNAP25   | A_52_P165961  | synaptosomal-associated protein 25                                                                                                    |
| SNAPC3   | A_51_P463270  | small nuclear RNA activating complex, polypeptide 3                                                                                   |
| Snhg11   | A_52_P70888   |                                                                                                                                       |
| SNRPN    | A_52_P354390  | small nuclear ribonucleoprotein N; SNRPN upstream reading frame; predicted gene 5802; similar to SNRPN upstream reading frame protein |
| SOCS2    | A_52_P84037   | suppressor of cytokine signaling 2; predicted gene 8000                                                                               |
| SOX11    | A_52_P160955  | SRY (sex determining region Y)-box 11                                                                                                 |
| SPOCK2   | A_52_P393181  | sparc/osteonectin, cwcv and kazal-like domains proteoglycan 2(Spock2)                                                                 |
| SRGAP1   | A_52_P477668  | SLIT-ROBO Rho GTPase activating protein 1(Srgap1)                                                                                     |
| SSBP2    | A_52_P557098  | single-stranded DNA binding protein 2(Ssbp2)                                                                                          |
| ST8SIA4  | A_51_P2326267 | ST8 alpha-N-acetyl-neuraminide alpha-2,8-sialyltransferase 4(St8sia4)                                                                 |
| STAC3    | A_51_P177261  | SH3 and cysteine rich domain 3                                                                                                        |
| STAU2    | A_52_P24896   | staufen (RNA binding protein) homolog 2 (Drosophila)                                                                                  |
| STC1     | A_52_P189970  | stanniocalcin 1                                                                                                                       |
| STMN2    | A_51_P164998  | stathmin-like 2                                                                                                                       |
| STRBP    | A_52_P634051  | spermatid perinuclear RNA binding protein                                                                                             |
| SV2A     | A_52_P202142  | synaptic vesicle glycoprotein 2 a                                                                                                     |
| SYNPO    | x             | synaptopodin(Synpo)                                                                                                                   |
| SYP      | A_51_P379428  | synaptophysin                                                                                                                         |
| SYT1     | A_52_P679799  | synaptotagmin I(Syt1)                                                                                                                 |
| SYT16    | A_51_P122867  | synaptotagmin XVII(Syt16)                                                                                                             |
| SYT4     | A_52_P624302  | synaptotagmin IV                                                                                                                      |
| TAC1     | A_51_P216456  | tachykinin 1                                                                                                                          |
| TANC2    | A_52_P442986  | tetratricopeptide repeat, ankyrin repeat and coiled-coil containing 2(Tanc2)                                                          |
| TBC1D16  | A_51_P412225  | TBC1 domain family, member 16(Tbc1d16)                                                                                                |
| TBC1D30  | A_51_P262616  | TBC1 domain family, member 30(Tbc1d30)                                                                                                |
| TBC1D9   | A_52_P683580  | TBC1 domain family, member 9                                                                                                          |
| TBR1     | A_51_P267017  | T-box brain gene 1                                                                                                                    |
| TENM2    | A_52_P472353  | teneurin transmembrane protein 2(Tenm2)                                                                                               |
| TENM3    | A_51_P383369  | odd Oz/ten-m homolog 3 (Drosophila)                                                                                                   |
| TENM4    | A_52_P206429  | teneurin transmembrane protein 4(Tenm4)                                                                                               |
| TMEM150C | A_51_P154379  | transmembrane protein 150C                                                                                                            |
| TMEM44   | A_52_P419290  | transmembrane protein 44                                                                                                              |
| TMOD2    | A_51_P234488  | tropomodulin 2                                                                                                                        |
| TRO      | A_52_P72831   | trophinin(Tro)                                                                                                                        |
| TRPC4    | A_52_P65273   | transient receptor potential cation channel, subfamily C, member 4(Trpc4)                                                             |
| TSPYL4   | A_52_P448357  | TSPY-like 4(Tspyl4)                                                                                                                   |
| TSPYL5   | A_52_P500002  | testis-specific protein, Y-encoded-like 5(Tspyl5)                                                                                     |
| UBE2D1   | A_52_P546459  | ubiquitin-conjugating enzyme E2D 1(Ube2d1)                                                                                            |
| UBQLN2   | A_52_P381929  | ubiquilin 2                                                                                                                           |
| VSNL1    | A_52_P515880  | visinin-like 1                                                                                                                        |

|         |              |                                                              |
|---------|--------------|--------------------------------------------------------------|
| VSTM2A  | A_52_P365781 | V-set and transmembrane domain containing 2A                 |
| WDR47   | A_52_P124195 | WD repeat domain 47                                          |
| WIF1    | A_51_P484526 | Wnt inhibitory factor 1(Wif1)                                |
| ZDBF2   | A_52_P571561 | zinc finger, DBF-type containing 2                           |
| ZNF385B | A_51_P451275 | similar to zinc finger protein 533; zinc finger protein 385B |
| ZNF711  | A_52_P753819 | zinc finger protein 711                                      |
| ZNF846  | A_52_P589664 |                                                              |
